# Supplementary material for: Integrating precision medicine in the study and clinical treatment of a severely mentally ill person
Source: PeerJ. 2013 Oct 3;1:e177. doi: 10.7717/peerj.177 (PMC3792182; doi:10.7717/peerj.177)
Supplement: File S9 — ERDS (version 1.06.04) derived CNVs were required to be >200 kb in length, with confidence scores of >300. CNAM (Golden Helix SVS version 7.7.5) CNVs were also required to be >200 kb in length with average segment LogR values of > 0.15 and < −0.15 for duplications and deletions, respectively. CNVs detected by both methods were visually inspected to eliminate obvious false positive calls. The 6 CNVs shown here were detected by each method, visually confirmed, and are thus considered high confidence. [file peerj-01-177-s014.xlsx]

## Sheet: high_conf_CNVs_test.annovar.gen
Region	Gene	Type	Length
chr6:161601836-161816660	AGPAT4,PARK2	DUP	214824
chr9:69513401-69788000	ncRNA_exonic: LOC100133920	DUP	274599
chr9:43425001-43705991	CNTNAP3B,SPATA31A6	DEL	280990
chr17:41409959-41635571	ARL4D,DHX8,ETV4	DUP	225612
chrX:52103601-52395800	XAGE1A,XAGE1B,XAGE1C,XAGE1D,XAGE1E,XAGE2,XAGE2B	DEL	292199
chrY:13239001-13547000	GYG2P1(dist=970915)	DEL	307999
