# Supplementary material for: Integrating precision medicine in the study and clinical treatment of a severely mentally ill person
Source: PubMed Central journal article supplement (PMC3792182; doi:10.7717/peerj.177), 2013-10-03
Supplement: peerj-01-177-s004.pdf [file peerj-01-177-s004.pdf]

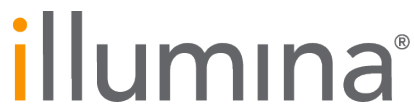

## Individual Genome Sequence Results

**Ordering Physician: Gholson Lyon , MD**

Steinmann Institute  
10 West Broadway, Suite #820  
Salt Lake City UT 84101

|                                |                   |
|--------------------------------|-------------------|
| <b>Patient Sex</b>             | Male              |
| <b>Patient Record Number</b>   | PG0000644-BLD     |
| <b>Date Reported</b>           | 10/14/2012        |
| <b>Indications for Testing</b> | Carrier Screening |

| Sample Type       | Sample Collection Date | Sample Receipt Date |
|-------------------|------------------------|---------------------|
| Blood, Peripheral | 7/2/2012               | 7/3/2012            |

**Test - IGS - Individual Genome Sequencing - Wellness**

Genome level sequencing was performed and calls made across greater than 90% of the genome. Clinical interpretation was performed using the American College of Medical Genetics recommendations for interpretation on 140 conditions causally associated with 344 genes. The complete list of all interpreted variants for this patient can be found at the end of this report. A list of the 140 conditions and 344 genes can be found on the attached document.

**RESULTS**

A total of **1247** variants were detected in the subset of genes for this patient. Each variant was evaluated for clinical significance and placed into one of five possible categories for classification, based on the American College of Medical Genetics and Genomics interpretation guidelines as outlined below and described at the end of this report.

| Category                          | Number of Variants | Condition        |
|-----------------------------------|--------------------|------------------|
| Clinically Significant in Patient | Pathogenic         | 0                |
|                                   | Likely Pathogenic  | 0                |
| Carrier Status for Patient        | Pathogenic         | 0                |
|                                   | Likely Pathogenic  | 1 Refsum Disease |
| Variants of Unknown Significance  | 284                |                  |
| Likely Benign Variants            | 349                |                  |
| Benign Variants                   | 613                |                  |

## MOLECULAR DIAGNOSTICS REPORT

### Clinically Significant in Patient

Variants that are clinically significant increase the individual's risk for a specific disease/disorder that is typically inherited as a dominant condition. Clinical correlation is recommended. The patient's first-degree relatives each have a 50% chance to carry the same variant as the patient. Testing for these at-risk family members should be considered, although the interpretation may be limited by the current understanding of this variant in the case of probably pathogenic variants.

**No pathogenic or likely pathogenic variants were found in the 344 genes evaluated that are expected to be clinically significant for the patient. The coverage for these 344 genes is at least 99%. Therefore, significant variants could exist that are not detected with this test. The coverage for each gene is listed in the attached document.**

### Carrier Status Evaluation

Variants affecting carrier status indicate that an individual does not have the associated disease/disorder but that they may pass the variant to their offspring. These are typically disorders that are inherited in a recessive manner. For some disorders, carriers can manifest symptoms that are typically milder than for affected individuals and they are then referred to as symptomatic carriers. If two carriers of pathogenic variants in the same gene have a child, each child has a 25% chance to be affected when the disease/disorder is inherited in an autosomal recessive fashion. The patient's first-degree relatives each have a 50% chance to be carriers of this same variant. Testing for these at-risk family members should be considered.

| Gene | Call     | Amino Acid  | Interpretation    | Associated Condition | Mode of Inheritance |
|------|----------|-------------|-------------------|----------------------|---------------------|
| PHYH | c.734G>A | p.Arg245Gln | Likely Pathogenic | Refsum Disease       | Autosomal Recessive |

### Refsum Disease

Refsum disease is an inherited condition that causes vision loss, anosmia, and a variety of other signs and symptoms. The vision loss is caused by retinitis pigmentosa. The first sign of retinitis pigmentosa is usually a loss of night vision, which often becomes apparent in childhood. Over a period of years, the disease disrupts peripheral vision and may eventually lead to blindness. Vision loss and anosmia are seen in almost everyone with Refsum disease, but other signs and symptoms vary. About one-third of affected individuals are born with bone abnormalities of the hands and feet. Features that appear later in life can include progressive myopathy; ataxia; hearing loss; and ichthyosis. Additionally, some people with Refsum disease develop arrhythmia and cardiomyopathies that can be life-threatening.

Jansen et al. (2000) conducted a case-control study of individuals with Refsum disease. In four patients, co-segregation of two missense mutations in the PHYH gene were found - c.530A>G and c.734G>A (Arg245Gln). Two of these patients were compound heterozygotes and two patients were homozygous for these variants. The c.734G>A variant was not found in controls and was not found as an isolated mutation. In silico prediction programs suggest little impact; however, the variant is rare with a 1000 Genomes frequency of ~0.18%. The frequency with which the variant was seen in cases compared to both controls and the 1000 Genomes population frequency is suggestive of pathogenicity.

### Variants of Unknown Clinical Significance/Novel Variants

Of the 1247 variants detected in this subset of genes, 284 variants have little or nothing reported about them in the scientific literature, and therefore, are considered Variants of Unknown Significance. This includes

## MOLECULAR DIAGNOSTICS REPORT

variants in genes that could be clinically significant or confer carrier status. At this time, the evidence is too weak or contradictory to assess whether the variant is pathogenic or benign. The interpretations of these variants are likely to change as more individuals are sequenced and the community understanding of the effect of the variant improves. A complete list of these variants, the genes in which they were found, and annotation characteristics can be found in the table at the end of this report.

### Benign/Likely Benign Variants

Finally, 613 variants categorized as benign and 349 variants categorized as likely benign polymorphisms were also found in these 344 genes. A complete list of these variants, the genes in which they were found, and annotation characteristics can be found in the table at the end of this report.

### Evaluation Criteria

As additional evidence may change our understanding of the roles of these variants in their associated conditions, regular review of the implications of these variants should be considered as appropriate. Additional variants that were not included in this interpretation could potentially result in the conditions discussed. A full list of the citations used to categorize the variants into these groups can be provided upon request. Criteria for classification:

- Pathogenic: Reported in at least 3 unrelated cases, with control data. Functional or expression evidence suggests deleterious effect on gene function.
- Likely pathogenic: Reported in < 3 cases, or in a single family cohort, with or without control data. Limited or no functional evidence available, but overall biological expectations suggestive of deleterious effect.
- Unknown significance: Little or nothing has been reported on this variant or its effects.
- Likely benign: The variant has been seen in cases, but also in controls. Variant may be present in a high percentage of the population, and may be present in a non-conserved region.
- Benign: Established in the literature as a variant that is not associated with Mendelian (single-gene inherited) disease, or known to have an allele frequency that is far too high to be compatible with the prevalence of disease, mode of inheritance and penetrance patterns known for that condition.

## TEST INFORMATION

### BACKGROUND:

Clinical interpretation was performed using the American College of Medical Genetics recommendations for interpretation on 140 conditions causally associated with 344 genes. Genome level sequencing was performed and calls made across greater than 90% of the genome. No other variants beyond those contained within the listed genes and conditions were evaluated for possible clinical significance. Therefore, other variants of possible clinical significance may exist within this genome. It is recommended that additional evaluations be performed as appropriate. All calls within these genes were evaluated for evidence of clinical importance including: allele frequency in population studies (dbSNP, 1000 Genomes, etc.), evidence in the scientific literature for likely causation of the condition, and consideration of the likely biological implications of the variant based on its expected characteristics. This assessment represents our current best understanding of the clinical implications of the variants reported. As information within the field increases, this understanding may change and the implications reported here may change. Occasional reassessment of this information is recommended as is appropriate or medically relevant to optimize the medical care of this individual.

### METHODOLOGY:

Sequence was generated from DNA that was extracted from peripheral whole blood. The regions of the genome not reported here include regions where the human reference genome has not been completely

## MOLECULAR DIAGNOSTICS REPORT

resolved, or where duplications of genetic regions make it impossible to align the fragments accurately. The official reference build 37.1 was used to align the Personal Genome Sequence reported here. (<http://www.ncbi.nlm.nih.gov/>) The analytical accuracy of these calls is at least 97%. This test was developed and its performance characteristics determined by Illumina Clinical Services Laboratory. It has not been cleared or approved by the U.S. Food and Drug Administration. Pursuant to the requirements of CLIA '88, this laboratory test has established and verified the test's accuracy and precision.



---

Philip D. Cotter, Ph.D., FACMG  
Director, Illumina Clinical Services Laboratory

Signed electronically by Philip Cotter, Ph.D.

### REFERENCES:

Jansen GA, Hogenhout EM, Ferdinandusse S, Waterham HR, Ofman R, Jakobs C, Skjeldal OH, Wanders RJ. 2000. Human phytanoyl-CoA hydroxylase: resolution of the gene structure and the molecular basis of Refsum's disease. *Hum. Mol. Genet.* 9(8):1195-200.

## MOLECULAR DIAGNOSTICS REPORT

### Interpreted Variants

| Gene    | dbSNP ID    | cDNA         | AA           | Zygoty       | Intepretation        |
|---------|-------------|--------------|--------------|--------------|----------------------|
| AARS    | rs141837805 | c.*324G>A    |              | Heterozygous | Unknown Significance |
| AARS    | rs4081753   | c.2715T>C    | p.Val905Val  | Homozygous   | Benign               |
| ABCA4   |             | c.5451G      | p.Glu1817    | Homozygous   | Unknown Significance |
| ABCA4   | rs4847281   | c.141A>G     | p.Pro47Pro   | Homozygous   | Benign               |
| ABCA4   | rs3112831   | c.1268A>G    | p.His423Arg  | Heterozygous | Benign               |
| ABCA4   | rs1762114   | c.6069T>C    | p.Ile2023Ile | Homozygous   | Benign               |
| ABCC8   |             | c.579+14C>T  |              | Homozygous   | Likely Benign        |
| ABCC8   |             | c.2117-3C>T  |              | Homozygous   | Likely Benign        |
| ABCC8   | rs1048099   | c.207T>C     | p.Pro69Pro   | Homozygous   | Benign               |
| ABCC9   |             | c.574-5C>A   |              | Heterozygous | Benign               |
| ABCC9   |             | c.1164+11A>G |              | Homozygous   | Benign               |
| ABCC9   | rs10770865  | c.1296T>C    | p.Pro432Pro  | Homozygous   | Benign               |
| ABCC9   |             | c.2199-11T>C |              | Homozygous   | Benign               |
| ACADM   |             | c.*672T>C    |              | Heterozygous | Unknown Significance |
| ACADM   |             | c.216+10T>C  |              | Heterozygous | Likely Benign        |
| ACADM   |             | c.1161A>G    | p.Val387Val  | Heterozygous | Likely Benign        |
| ACADM   |             | c.*878T>C    |              | Homozygous   | Benign               |
| ACADS   |             | c.625G>A     | p.Gly209Ser  | Heterozygous | Unknown Significance |
| ACADS   |             | c.*21G>C     |              | Heterozygous | Unknown Significance |
| ACADS   |             | c.*527A>G    |              | Heterozygous | Likely Benign        |
| ACADS   |             | c.321T>C     | p.Arg107Arg  | Heterozygous | Benign               |
| ACADS   |             | c.990C>T     | p.Arg330Arg  | Heterozygous | Benign               |
| ACADVL  |             | c.1605+6T>C  |              | Heterozygous | Benign               |
| ACTC1   |             | c.*472T>C    |              | Heterozygous | Unknown Significance |
| ACTC1   |             | c.*388G>A    |              | Heterozygous | Likely Benign        |
| ACTC1   |             | c.*1682A>G   |              | Heterozygous | Likely Benign        |
| ACTC1   |             | c.*2090A>G   |              | Heterozygous | Likely Benign        |
| ACTC1   |             | c.*1039G>A   |              | Homozygous   | Benign               |
| ACTN2   |             | c.*447C>G    |              | Homozygous   | Likely Benign        |
| ACTN2   |             | c.*748A>G    |              | Homozygous   | Likely Benign        |
| ACTN2   | rs1341864   | c.351T>C     | p.Ile117Ile  | Homozygous   | Benign               |
| ACTN2   | rs1341863   | c.378C>T     | p.Asn126Asn  | Homozygous   | Benign               |
| ACTN2   |             | c.877-8C>G   |              | Homozygous   | Benign               |
| ACTN2   |             | c.*526T>C    |              | Homozygous   | Benign               |
| ACVRL1  |             | c.*1662A>T   |              | Heterozygous | Unknown Significance |
| ACVRL1  |             | c.313+11C>T  |              | Homozygous   | Likely Benign        |
| ACVRL1  |             | c.*1246T>C   |              | Homozygous   | Benign               |
| ADA     | rs394105    | c.36G>A      | p.Val12Val   | Homozygous   | Benign               |
| ADAMTS2 |             | c.858C>T     | p.His286His  | Heterozygous | Likely Benign        |

## MOLECULAR DIAGNOSTICS REPORT

| Gene    | dbSNP ID   | cDNA         | AA           | Zygotity     | Intepretation        |
|---------|------------|--------------|--------------|--------------|----------------------|
| ADAMTS2 | rs2278221  | c.1194C>T    | p.Asp398Asp  | Heterozygous | Likely Benign        |
| ADAMTS2 | rs1054480  | c.3529C>T    | p.Pro1177Ser | Heterozygous | Likely Benign        |
| ADAMTS2 |            | c.*1586A>G   |              | Heterozygous | Likely Benign        |
| ADAMTS2 |            | c.*2396C>T   |              | Heterozygous | Likely Benign        |
| ADAMTS2 |            | c.*2951G>A   |              | Heterozygous | Likely Benign        |
| ADAMTS2 |            | c.*2952T>A   |              | Heterozygous | Likely Benign        |
| ADAMTS2 | rs423552   | c.786G>A     | p.Ala262Ala  | Homozygous   | Benign               |
| ADAMTS2 | rs35462609 | c.936C>T     | p.Asn312Asn  | Heterozygous | Benign               |
| ADAMTS2 |            | c.*212A>C    |              | Heterozygous | Benign               |
| ADAMTS2 |            | c.*842T>C    |              | Heterozygous | Benign               |
| AGA     |            | c.*183A>C    |              | Homozygous   | Likely Benign        |
| AGA     | rs2228119  | c.446C>G     | p.Thr149Ser  | Homozygous   | Benign               |
| AKAP9   |            | c.1389G>T    | p.Met463Ile  | Heterozygous | Unknown Significance |
| AKAP9   |            | c.6888A>G    | p.Gln2296Gln | Heterozygous | Unknown Significance |
| AKAP9   |            | c.8375A>G    | p.Asn2792Ser | Heterozygous | Unknown Significance |
| AKAP9   |            | c.3504A>G    | p.Glu1168Glu | Heterozygous | Likely Benign        |
| AKAP9   |            | c.5778C>T    | p.Gly1926Gly | Heterozygous | Likely Benign        |
| AKAP9   |            | c.6945+8C>T  |              | Heterozygous | Likely Benign        |
| AKAP9   |            | c.8665C>T    | p.Leu2889Leu | Heterozygous | Likely Benign        |
| AKAP9   |            | c.9145C>T    | p.Leu3049Leu | Heterozygous | Likely Benign        |
| AKAP9   |            | c.10426A>C   | p.Arg3476Arg | Heterozygous | Likely Benign        |
| AKAP9   |            | c.-124G>C    |              | Heterozygous | Benign               |
| AKAP9   | rs1989779  | c.3075C>T    | p.Thr1025Thr | Homozygous   | Benign               |
| AKAP9   | rs1063242  | c.8935C>T    | p.Pro2979Ser | Homozygous   | Benign               |
| ALS2    |            | c.4119A>G    | p.Ile1373Met | Heterozygous | Unknown Significance |
| ALS2    |            | c.20+7T>C    |              | Heterozygous | Likely Benign        |
| ALS2    | rs3219156  | c.1102G>A    | p.Val368Met  | Homozygous   | Benign               |
| ALS2    | rs2276615  | c.2466G>A    | p.Val822Val  | Homozygous   | Benign               |
| ALS2    | rs3219168  | c.4015C>T    | p.Leu1339Leu | Homozygous   | Benign               |
| ANK1    |            | c.3224C      | p.Thr1075    | Homozygous   | Unknown Significance |
| ANK1    |            | c.4385C>T    | p.Ala1462Val | Heterozygous | Unknown Significance |
| ANK1    |            | c.4506C>T    | p.Arg1502Arg | Heterozygous | Unknown Significance |
| ANK1    | rs2304871  | c.315C>T     | p.Asn105Asn  | Heterozygous | Likely Benign        |
| ANK1    |            | c.4101C>T    | p.Ala1367Ala | Heterozygous | Likely Benign        |
| ANK1    |            | c.5479-3T>C  |              | Homozygous   | Benign               |
| ANK2    |            | c.3579C>T    | p.Arg1193Arg | Heterozygous | Likely Benign        |
| ANK2    |            | c.3893+14G>T |              | Heterozygous | Likely Benign        |
| ANK2    | rs3733615  | c.7110A>G    | p.Gln2370Gln | Heterozygous | Likely Benign        |
| ANK2    |            | c.8503C>T    | p.Pro2835Ser | Heterozygous | Likely Benign        |
| ANK2    | rs2293324  | c.11673T>C   | p.His3891His | Heterozygous | Likely Benign        |
| ANO5    | rs35827261 | c.*3121A>G   |              | Heterozygous | Unknown Significance |

## MOLECULAR DIAGNOSTICS REPORT

| Gene  | dbSNP ID   | cDNA       | AA           | Zygosity     | Intepretation        |
|-------|------------|------------|--------------|--------------|----------------------|
| ANO5  | rs7481951  | c.966A>T   | p.Leu322Phe  | Heterozygous | Likely Benign        |
| ANO5  |            | c.*496A>G  |              | Heterozygous | Likely Benign        |
| ANO5  |            | c.-136G>C  |              | Homozygous   | Benign               |
| ANO5  | rs4312063  | c.267T>C   | p.Asp89Asp   | Homozygous   | Benign               |
| ANO5  |            | c.*1286G>T |              | Heterozygous | Benign               |
| ANO5  |            | c.*3178C>G |              | Heterozygous | Benign               |
| APC   |            | c.*1098T>C |              | Homozygous   | Likely Benign        |
| APC   |            | c.*1556C>G |              | Homozygous   | Likely Benign        |
| APC   |            | c.1458T>C  | p.Tyr486Tyr  | Homozygous   | Benign               |
| APC   | rs351771   | c.1635G>A  | p.Ala545Ala  | Homozygous   | Benign               |
| APC   | rs41115    | c.4479G>A  | p.Thr1493Thr | Homozygous   | Benign               |
| APC   | rs42427    | c.5034G>A  | p.Gly1678Gly | Homozygous   | Benign               |
| APC   | rs866006   | c.5268T>G  | p.Ser1756Ser | Homozygous   | Benign               |
| APC   | rs459552   | c.5465T>A  | p.Val1822Asp | Homozygous   | Benign               |
| APC   | rs465899   | c.5880G>A  | p.Pro1960Pro | Homozygous   | Benign               |
| APC   |            | c.*1753G>A |              | Homozygous   | Benign               |
| APOB  |            | c.10294C   | p.Gln3432    | Homozygous   | Unknown Significance |
| APOB  | rs1041968  | c.6936C>T  |              | Heterozygous | Likely Benign        |
| APOB  | rs693      | c.7545C>T  |              | Heterozygous | Likely Benign        |
| APOB  | rs679899   | c.1853C>T  |              | Heterozygous | Benign               |
| APOB  | rs568413   | c.4265A>G  |              | Homozygous   | Benign               |
| APOB  | rs584542   | c.6937A>G  |              | Homozygous   | Benign               |
| APOB  | rs676210   | c.8216C>T  |              | Heterozygous | Benign               |
| APOB  | rs1042034  | c.13013G>A |              | Heterozygous | Benign               |
| APP   |            | c.-111G>C  |              | Heterozygous | Unknown Significance |
| ARSA  | rs743616   | c.1178C>G  | p.Thr393Ser  | Homozygous   | Likely Benign        |
| ARSA  |            | c.*682G>C  |              | Homozygous   | Likely Benign        |
| ARSA  |            | c.*855G>A  |              | Homozygous   | Likely Benign        |
| ARSA  |            | c.*919A>G  |              | Homozygous   | Benign               |
| ARSA  |            | c.*1351C>G |              | Homozygous   | Benign               |
| ARSB  |            | c.-958A>G  |              | Homozygous   | Unknown Significance |
| ARSB  |            | c.-906C>G  |              | Homozygous   | Unknown Significance |
| ARSB  |            | c.-564A>G  |              | Homozygous   | Unknown Significance |
| ARSB  |            | c.1191G>A  | p.Pro397Pro  | Heterozygous | Likely Benign        |
| ARSB  |            | c.*2022T>G |              | Homozygous   | Likely Benign        |
| ARSB  |            | c.-302A>G  |              | Homozygous   | Benign               |
| ARSB  |            | c.*2975G>T |              | Homozygous   | Benign               |
| ASAH1 |            | c.*926A>C  |              | Homozygous   | Likely Benign        |
| ASAH1 | rs10103355 | c.737T>C   | p.Val246Ala  | Homozygous   | Benign               |
| ASAH1 |            | c.*1073C>T |              | Homozygous   | Benign               |
| ASPA  | rs12948217 | c.693C>T   | p.Tyr231Tyr  | Homozygous   | Likely Benign        |
| ASPA  |            | c.*139C>A  |              | Homozygous   | Benign               |
| ASS1  |            | c.-323G>T  |              | Heterozygous | Unknown Significance |

## MOLECULAR DIAGNOSTICS REPORT

| Gene   | dbSNP ID  | cDNA        | AA           | Zygoty       | Intepretation        |
|--------|-----------|-------------|--------------|--------------|----------------------|
| ATP7B  |           | c.287G      | p.Gly96      | Homozygous   | Unknown Significance |
| ATP7B  |           | c.2623G     | p.Gly875     | Homozygous   | Unknown Significance |
| ATP7B  | rs1801248 | c.3045G>A   | p.Leu1015Leu | Heterozygous | Unknown Significance |
| ATP7B  |           | c.3903+6C>T |              | Homozygous   | Likely Benign        |
| ATP7B  |           | c.*1172G>A  |              | Homozygous   | Likely Benign        |
| ATP7B  |           | c.-75C>A    |              | Homozygous   | Benign               |
| ATP7B  | rs1801243 | c.1216T>G   | p.Ser406Ala  | Homozygous   | Benign               |
| ATP7B  | rs1801244 | c.1366G>C   | p.Val456Leu  | Homozygous   | Benign               |
| ATP7B  | rs1061472 | c.2495A>G   | p.Lys832Arg  | Homozygous   | Benign               |
| ATP7B  | rs732774  | c.2855G>A   | p.Arg952Lys  | Homozygous   | Benign               |
| ATP7B  | rs1801249 | c.3419T>C   | p.Val1140Ala | Homozygous   | Benign               |
| BCKDHB |           | c.*731C>T   |              | Heterozygous | Likely Benign        |
| BCKDHB |           | c.*121G>A   |              | Homozygous   | Benign               |
| BCKDHB |           | c.*293T>C   |              | Homozygous   | Benign               |
| BCKDHB |           | c.*304G>A   |              | Homozygous   | Benign               |
| BCKDHB |           | c.*345C>T   |              | Homozygous   | Benign               |
| BCKDHB |           | c.*395G>T   |              | Homozygous   | Benign               |
| BCKDHB |           | c.*627T>C   |              | Homozygous   | Benign               |
| BCKDHB |           | c.*789C>T   |              | Homozygous   | Benign               |
| BCKDHB |           | c.*805T>C   |              | Homozygous   | Benign               |
| BCKDHB |           | c.*994G>A   |              | Homozygous   | Benign               |
| BCKDHB |           | c.*1142C>G  |              | Homozygous   | Benign               |
| BCKDHB |           | c.*1241A>G  |              | Homozygous   | Benign               |
| BCKDHB |           | c.*1444T>C  |              | Homozygous   | Benign               |
| BCKDHB |           | c.*1778A>G  |              | Homozygous   | Benign               |
| BCKDHB |           | c.*1810T>C  |              | Homozygous   | Benign               |
| BCKDHB |           | c.*1875G>A  |              | Homozygous   | Benign               |
| BCKDHB |           | c.*2271G>A  |              | Homozygous   | Benign               |
| BCKDHB |           | c.*2282C>T  |              | Homozygous   | Benign               |
| BEST1  |           | c.201G>C    | p.Leu67Leu   | Heterozygous | Unknown Significance |
| BEST1  |           | c.-221T>C   |              | Heterozygous | Benign               |
| BEST1  | rs1800007 | c.109T>C    | p.Leu37Leu   | Heterozygous | Benign               |
| BRCA1  | rs4986850 | c.2077G>A   | p.Asp693Asn  | Heterozygous | Unknown Significance |
| BRCA1  | rs1799949 | c.2082C>T   | p.Ser694Ser  | Heterozygous | Likely Benign        |
| BRCA1  | rs16940   | c.2311T>C   | p.Leu771Leu  | Heterozygous | Likely Benign        |
| BRCA1  | rs16941   | c.3113A>G   | p.Glu1038Gly | Heterozygous | Likely Benign        |
| BRCA1  | rs16942   | c.3548A>G   | p.Lys1183Arg | Heterozygous | Likely Benign        |
| BRCA1  | rs1060915 | c.4308T>C   | p.Ser1436Ser | Heterozygous | Likely Benign        |
| BRCA1  | rs1799966 | c.4837A>G   | p.Ser1613Gly | Heterozygous | Likely Benign        |
| BRCA1  |           | c.*421G>T   |              | Heterozygous | Likely Benign        |
| BRCA1  | rs799917  | c.2612C>T   | p.Pro871Leu  | Heterozygous | Benign               |
| BRCA2  |           | c.865A>C    |              | Heterozygous | Unknown Significance |



## MOLECULAR DIAGNOSTICS REPORT

| Gene    | dbSNP ID   | cDNA         | AA           | Zygoty       | Intepretation        |
|---------|------------|--------------|--------------|--------------|----------------------|
| BRCA2   |            | c.1365A>G    |              | Heterozygous | Unknown Significance |
| BRCA2   |            | c.2229T>C    |              | Heterozygous | Unknown Significance |
| BRCA2   |            | c.2971A>G    |              | Heterozygous | Unknown Significance |
| BRCA2   |            | c.*105A>C    |              | Heterozygous | Unknown Significance |
| BRCA2   | rs543304   | c.3807T>C    |              | Heterozygous | Benign               |
| BRCA2   | rs206075   | c.4563A>G    |              | Homozygous   | Benign               |
| BRCA2   | rs206076   | c.6513G>C    |              | Homozygous   | Benign               |
| BRCA2   | rs169547   | c.7397T>C    |              | Homozygous   | Benign               |
| BRCA2   |            | c.7806-14T>C |              | Heterozygous | Benign               |
| BRIP1   |            | c.*2090G>C   |              | Heterozygous | Unknown Significance |
| BRIP1   |            | c.*3488A>T   |              | Heterozygous | Likely Benign        |
| BRIP1   | rs4986765  | c.2637A>G    | p.Glu879Glu  | Heterozygous | Benign               |
| BRIP1   | rs4986764  | c.2755T>C    | p.Ser919Pro  | Heterozygous | Benign               |
| BRIP1   | rs4986763  | c.3411T>C    | p.Tyr1137Tyr | Heterozygous | Benign               |
| BRIP1   |            | c.*483C>T    |              | Heterozygous | Benign               |
| BRIP1   |            | c.*3514T>G   |              | Heterozygous | Benign               |
| BSND    | rs33938617 | c.924G>A     | p.Pro308Pro  | Heterozygous | Likely Benign        |
| BSND    |            | c.*24A>C     |              | Heterozygous | Likely Benign        |
| BSND    |            | c.-117T>C    |              | Homozygous   | Benign               |
| BSND    |            | c.-70C>G     |              | Homozygous   | Benign               |
| CACNA1C | rs216008   | c.3786C>T    | p.Phe1262Phe | Heterozygous | Likely Benign        |
| CACNA1C | rs1544514  | c.522G>A     | p.Ala174Ala  | Heterozygous | Benign               |
| CACNA1C | rs56180838 | c.4038C>T    | p.Ile1346Ile | Heterozygous | Benign               |
| CACNA1C | rs1051375  | c.5361G>A    | p.Thr1787Thr | Homozygous   | Benign               |
| CACNA1C |            | c.*284C>T    |              | Heterozygous | Benign               |
| CACNA1C |            | c.*4273A>G   |              | Homozygous   | Benign               |
| CACNA1C |            | c.*4831T>A   |              | Homozygous   | Benign               |
| CACNA1C |            | c.*5970A>C   |              | Homozygous   | Benign               |
| CACNB2  |            | c.-253G>A    |              | Heterozygous | Unknown Significance |
| CACNB2  |            | c.*10G>T     |              | Homozygous   | Unknown Significance |
| CACNB2  |            | c.*608T>A    |              | Heterozygous | Unknown Significance |
| CACNB2  |            | c.*609A>T    |              | Heterozygous | Unknown Significance |
| CACNB2  |            | c.892+7C>T   |              | Heterozygous | Likely Benign        |
| CACNB2  | rs2228645  | c.1539C>T    | p.Tyr513Tyr  | Heterozygous | Likely Benign        |
| CACNB2  |            | c.*1965C>T   |              | Heterozygous | Likely Benign        |
| CACNB2  |            | c.*2016T>C   |              | Homozygous   | Benign               |
| CAPN3   |            | c.96T>C      | p.Thr32Thr   | Heterozygous | Unknown Significance |
| CAPN3   |            | c.*134C>T    |              | Homozygous   | Benign               |
| CDH1    |            | c.1937-13T>C |              | Heterozygous | Unknown Significance |

## MOLECULAR DIAGNOSTICS REPORT

| Gene   | dbSNP ID   | cDNA         | AA           | Zygosity     | Intepretation        |
|--------|------------|--------------|--------------|--------------|----------------------|
| CDH1   |            | c.*1120T>C   |              | Heterozygous | Unknown Significance |
| CDH1   |            | c.48+6C>T    |              | Homozygous   | Benign               |
| CDH1   |            | c.2076T>C    | p.Ala692Ala  | Homozygous   | Benign               |
| CDH23  |            | c.1469G>C    | p.Gly490Ala  | Heterozygous | Unknown Significance |
| CDH23  |            | c.5411G>A    | p.Arg1804Gln | Heterozygous | Unknown Significance |
| CDH23  |            | c.5503-10A>G |              | Heterozygous | Unknown Significance |
| CDH23  |            | c.6130G>A    | p.Glu2044Lys | Heterozygous | Unknown Significance |
| CDH23  |            | c.7073G>A    | p.Arg2358Gln | Heterozygous | Unknown Significance |
| CDH23  |            | c.7139C>T    | p.Pro2380Leu | Heterozygous | Unknown Significance |
| CDH23  |            | c.8895C>T    | p.Pro2965Pro | Heterozygous | Unknown Significance |
| CDH23  |            | c.9077+8G>A  |              | Heterozygous | Unknown Significance |
| CDH23  |            | c.9319+11G>A |              | Heterozygous | Unknown Significance |
| CDH23  |            | c.5100C>T    | p.Tyr1700Tyr | Heterozygous | Likely Benign        |
| CDH23  |            | c.7572G>A    | p.Ala2524Ala | Heterozygous | Likely Benign        |
| CDH23  | rs3752752  | c.2316T>C    | p.Asn772Asn  | Heterozygous | Benign               |
| CDH23  | rs3752751  | c.2388T>C    | p.Asp796Asp  | Heterozygous | Benign               |
| CDH23  | rs1227065  | c.4051A>G    | p.Asn1351Asp | Heterozygous | Benign               |
| CDH23  |            | c.4723G>A    | p.Ala1575Thr | Heterozygous | Benign               |
| CDH23  |            | c.*349A>G    |              | Heterozygous | Benign               |
| CDK4   |            | c.*521G>A    |              | Heterozygous | Unknown Significance |
| CERKL  |            | c.*1159C>T   |              | Homozygous   | Likely Benign        |
| CERKL  | rs1473295  | c.156C>T     | p.Phe52Phe   | Heterozygous | Benign               |
| CERKL  |            | c.1133+13T>C |              | Homozygous   | Benign               |
| CERKL  | rs10180793 | c.1506C>T    | p.Asp502Asp  | Homozygous   | Benign               |
| CERKL  |            | c.*121C>T    |              | Homozygous   | Benign               |
| CERKL  |            | c.*880G>A    |              | Homozygous   | Benign               |
| CERKL  |            | c.*1345G>A   |              | Homozygous   | Benign               |
| CFTR   |            | c.869+11C>T  |              | Heterozygous | Unknown Significance |
| CFTR   |            | c.1365G>T    | p.Ala455Ala  | Heterozygous | Unknown Significance |
| CFTR   | rs1800131  | c.3897A>G    | p.Thr1299Thr | Heterozygous | Unknown Significance |
| CFTR   | rs213950   | c.1408G>A    | p.Val470Met  | Heterozygous | Benign               |
| CHMP2B |            | c.*1589G>A   |              | Heterozygous | Likely Benign        |
| CHMP2B | rs11540913 | c.312T>C     | p.Thr104Thr  | Homozygous   | Benign               |
| CLDN14 | rs219780   | c.687G>A     | p.Thr229Thr  | Heterozygous | Unknown Significance |
| CLDN14 |            | c.243C>T     | p.Arg81Arg   | Heterozygous | Likely Benign        |
| CLN6   |            | c.*817C>T    |              | Heterozygous | Likely Benign        |

## MOLECULAR DIAGNOSTICS REPORT

| Gene    | dbSNP ID   | cDNA         | AA           | Zygotity     | Intepretation        |
|---------|------------|--------------|--------------|--------------|----------------------|
| CNGA1   | rs224801   | c.-117C>T    |              | Homozygous   | Likely Benign        |
| CNGB1   |            | c.*1228C>G   |              | Homozygous   | Unknown Significance |
| CNGB1   | rs17821448 | c.327C>T     | p.Gly109Gly  | Heterozygous | Likely Benign        |
| CNGB1   |            | c.1122-15C>T |              | Heterozygous | Likely Benign        |
| CNGB1   |            | c.2193C>T    | p.Asn731Asn  | Heterozygous | Likely Benign        |
| CNGB1   |            | c.2218-12C>T |              | Heterozygous | Likely Benign        |
| CNGB1   |            | c.3462+7T>C  |              | Homozygous   | Likely Benign        |
| CNGB1   |            | c.*919G>A    |              | Homozygous   | Likely Benign        |
| CNGB1   | rs13336595 | c.299G>A     | p.Arg100His  | Heterozygous | Benign               |
| CNGB1   |            | c.2635-10C>T |              | Heterozygous | Benign               |
| CNGB1   | rs413562   | c.2664C>G    | p.Ala888Ala  | Heterozygous | Benign               |
| COCH    |            | c.*27A>T     |              | Heterozygous | Unknown Significance |
| COCH    | rs1045644  | c.1055C>G    | p.Thr352Ser  | Homozygous   | Likely Benign        |
| COL11A2 |            | c.826G>A     | p.Glu276Lys  | Heterozygous | Likely Benign        |
| COL11A2 |            | c.877-4T>A   |              | Heterozygous | Likely Benign        |
| COL11A2 |            | c.3384C>T    | p.Pro1128Pro | Heterozygous | Likely Benign        |
| COL11A2 |            | c.1360-7A>C  |              | Homozygous   | Benign               |
| COL11A2 |            | c.2628+3G>A  |              | Heterozygous | Benign               |
| COL11A2 | rs2229785  | c.2700T>C    | p.Asp900Asp  | Heterozygous | Benign               |
| COL11A2 |            | c.3150+15A>C |              | Heterozygous | Benign               |
| COL11A2 | rs1799910  | c.3174G>A    | p.Pro1058Pro | Heterozygous | Benign               |
| COL11A2 |            | c.3313-11C>T |              | Heterozygous | Benign               |
| COL1A2  | rs412777   | c.1446A>C    | p.Pro482Pro  | Heterozygous | Likely Benign        |
| COL1A2  |            | c.936+14C>T  |              | Heterozygous | Benign               |
| COL1A2  |            | c.937-3C>T   |              | Heterozygous | Benign               |
| COL1A2  | rs42524    | c.1645C>G    | p.Pro549Ala  | Heterozygous | Benign               |
| COL3A1  |            | c.2244T>C    |              | Heterozygous | Likely Benign        |
| COL3A1  | rs1516446  | c.4059T>G    |              | Homozygous   | Benign               |
| COL5A1  | rs3827848  | c.4122G>A    | p.Thr1374Thr | Heterozygous | Unknown Significance |
| COL5A1  | rs77176843 | c.4230+6G>A  |              | Heterozygous | Unknown Significance |
| COL5A1  |            | c.738C>T     | p.Thr246Thr  | Heterozygous | Likely Benign        |
| COL5A1  |            | c.4176+9T>G  |              | Heterozygous | Likely Benign        |
| COL5A1  | rs3811146  | c.4482G>C    | p.Pro1494Pro | Heterozygous | Likely Benign        |
| COL5A1  |            | c.*267C>T    |              | Homozygous   | Likely Benign        |
| COL5A1  |            | c.*733C>A    |              | Homozygous   | Likely Benign        |
| COL5A1  |            | c.-247T>G    |              | Homozygous   | Benign               |
| COL5A1  |            | c.1432-5T>C  |              | Heterozygous | Benign               |
| COL5A1  |            | c.2952+11A>T |              | Heterozygous | Benign               |
| COL5A1  |            | c.*83C>T     |              | Homozygous   | Benign               |
| COL5A1  |            | c.*1125A>T   |              | Homozygous   | Benign               |
| COL5A1  |            | c.*2395G>T   |              | Homozygous   | Benign               |
| COL5A1  |            | c.*2501T>C   |              | Homozygous   | Benign               |
| COL5A2  | rs4128539  | c.315C>A     | p.Thr105Thr  | Homozygous   | Benign               |
| COL5A2  | rs2229495  | c.1311A>G    | p.Pro437Pro  | Homozygous   | Benign               |

## MOLECULAR DIAGNOSTICS REPORT

| Gene   | dbSNP ID  | cDNA         | AA           | Zygotity     | Intepretation        |
|--------|-----------|--------------|--------------|--------------|----------------------|
| COL5A2 | rs6434312 | c.3411T>C    | p.Gly1137Gly | Homozygous   | Benign               |
| COL6A1 |           | c.2549G>A    | p.Arg850His  | Heterozygous | Unknown Significance |
| COL6A1 |           | c.1957-11C>T |              | Heterozygous | Likely Benign        |
| COL6A1 |           | c.2667G>A    | p.Ala889Ala  | Heterozygous | Likely Benign        |
| COL6A1 |           | c.2796C>T    | p.Ser932Ser  | Heterozygous | Likely Benign        |
| COL6A1 |           | c.428+14A>G  |              | Homozygous   | Benign               |
| COL6A1 | rs1980982 | c.1095T>C    | p.Gly365Gly  | Heterozygous | Benign               |
| COL6A1 |           | c.1956+15C>T |              | Heterozygous | Benign               |
| COL6A1 |           | c.2434+15A>G |              | Homozygous   | Benign               |
| COL6A1 |           | c.*260A>G    |              | Homozygous   | Benign               |
| COL6A1 |           | c.*419A>G    |              | Homozygous   | Benign               |
| COL6A3 | rs1131296 | c.9206C>T    | p.Thr3069Ile | Heterozygous | Unknown Significance |
| COL6A3 | rs4433949 | c.7929G>A    | p.Ala2643Ala | Heterozygous | Likely Benign        |
| COL6A3 | rs3790993 | c.6855G>C    | p.Gly2285Gly | Heterozygous | Benign               |
| COL6A3 | rs6728818 | c.8780T>C    | p.Met2927Thr | Heterozygous | Benign               |
| COL6A3 | rs2270669 | c.9034G>C    | p.Ala3012Pro | Heterozygous | Benign               |
| CPS1   |           | c.*438T>G    |              | Heterozygous | Likely Benign        |
| CPS1   |           | c.*692C>G    |              | Heterozygous | Likely Benign        |
| CPS1   | rs1047883 | c.1030A>G    | p.Thr344Ala  | Homozygous   | Benign               |
| CPS1   | rs2229589 | c.1032C>T    | p.Thr344Thr  | Homozygous   | Benign               |
| CPS1   | rs2287599 | c.2679C>G    | p.Gly893Gly  | Homozygous   | Benign               |
| CPT2   |           | c.1102G>A    | p.Val368Ile  | Homozygous   | Benign               |
| CRB1   | rs3902057 | c.1410A>G    | p.Leu470Leu  | Homozygous   | Unknown Significance |
| CRX    |           | c.100+12C>T  |              | Heterozygous | Unknown Significance |
| CRX    |           | c.*1046C>T   |              | Heterozygous | Unknown Significance |
| CRX    |           | c.*1289G>A   |              | Heterozygous | Unknown Significance |
| CRX    |           | c.*2380C>T   |              | Heterozygous | Unknown Significance |
| CRX    |           | c.*400A>T    |              | Heterozygous | Likely Benign        |
| CRX    |           | c.*401A>C    |              | Heterozygous | Likely Benign        |
| CRX    |           | c.*579T>C    |              | Heterozygous | Likely Benign        |
| CRX    |           | c.*591G>C    |              | Heterozygous | Likely Benign        |
| CRX    |           | c.*682C>T    |              | Heterozygous | Likely Benign        |
| CRX    |           | c.*966G>C    |              | Heterozygous | Likely Benign        |
| CRX    |           | c.*1346G>A   |              | Heterozygous | Likely Benign        |
| CRX    |           | c.*2106C>T   |              | Heterozygous | Likely Benign        |
| CRX    |           | c.*2559G>C   |              | Heterozygous | Likely Benign        |
| CRX    |           | c.*2704C>T   |              | Heterozygous | Likely Benign        |
| CRX    |           | c.*2717G>T   |              | Heterozygous | Likely Benign        |
| CRX    |           | c.*2937T>C   |              | Heterozygous | Likely Benign        |
| CRX    |           | c.*3017C>T   |              | Heterozygous | Likely Benign        |
| CRX    |           | c.*3279C>T   |              | Heterozygous | Likely Benign        |
| CRX    |           | c.*3301T>C   |              | Heterozygous | Likely Benign        |

## MOLECULAR DIAGNOSTICS REPORT

| Gene   | dbSNP ID    | cDNA         | AA          | Zygoty       | Intepretation        |
|--------|-------------|--------------|-------------|--------------|----------------------|
| CRX    |             | c.*1455T>A   |             | Heterozygous | Benign               |
| CRX    |             | c.*2183T>C   |             | Heterozygous | Benign               |
| CTF1   |             | c.*704T>C    |             | Homozygous   | Benign               |
| CTNS   |             | c.*737T>A    |             | Heterozygous | Likely Benign        |
| CTNS   | rs161400    | c.779C>T     | p.Thr260Ile | Homozygous   | Benign               |
| CTNS   |             | c.*738T>G    |             | Homozygous   | Benign               |
| CTNS   |             | c.*1440A>G   |             | Homozygous   | Benign               |
| CTNS   |             | c.*2306T>C   |             | Homozygous   | Benign               |
| CTSA   |             | c.-172A>C    |             | Heterozygous | Unknown Significance |
| CTSA   |             | c.-322G>A    |             | Heterozygous | Likely Benign        |
| CTSA   |             | c.1002+7G>A  |             | Heterozygous | Benign               |
| CTSA   |             | c.1142+10C>T |             | Heterozygous | Benign               |
| DBT    | rs115442245 | c.*5919A>G   |             | Heterozygous | Unknown Significance |
| DBT    |             | c.*9082C>T   |             | Heterozygous | Unknown Significance |
| DBT    | rs12021720  | c.1150A>G    | p.Ser384Gly | Homozygous   | Likely Benign        |
| DBT    |             | c.*5317T>C   |             | Heterozygous | Likely Benign        |
| DBT    |             | c.*3233C>T   |             | Homozygous   | Benign               |
| DBT    |             | c.*5150A>G   |             | Homozygous   | Benign               |
| DBT    |             | c.*5546G>A   |             | Homozygous   | Benign               |
| DBT    |             | c.*6228A>T   |             | Homozygous   | Benign               |
| DES    | rs1058261   | c.828C>T     | p.Asp276Asp | Heterozygous | Likely Benign        |
| DES    | rs12920     | c.1014G>C    | p.Leu338Leu | Heterozygous | Likely Benign        |
| DES    | rs1058284   | c.1104G>A    | p.Ala368Ala | Heterozygous | Likely Benign        |
| DES    | rs1318299   | c.75A>G      | p.Pro25Pro  | Homozygous   | Benign               |
| DES    | rs2017800   | c.93T>C      | p.Ser31Ser  | Homozygous   | Benign               |
| DFNB31 |             | c.1318G>A    |             | Heterozygous | Unknown Significance |
| DFNB31 |             | c.1627-12G>A |             | Heterozygous | Unknown Significance |
| DFNB31 |             | c.2388C>A    |             | Heterozygous | Unknown Significance |
| DFNB31 |             | c.-510G>A    |             | Heterozygous | Likely Benign        |
| DFNB31 |             | c.-391C>A    |             | Heterozygous | Likely Benign        |
| DFNB31 | rs10817610  | c.1091G>A    |             | Homozygous   | Benign               |
| DFNB31 | rs4979387   | c.1353T>C    |             | Heterozygous | Benign               |
| DFNB31 | rs942519    | c.1838T>C    |             | Heterozygous | Benign               |
| DFNB31 | rs6478078   | c.2256C>G    |             | Homozygous   | Benign               |
| DFNB31 | rs2274159   | c.2348T>C    |             | Heterozygous | Benign               |
| DFNB59 |             | c.793C>G     | p.Arg265Gly | Heterozygous | Unknown Significance |
| DHCR7  |             | c.-23T>C     |             | Heterozygous | Unknown Significance |
| DHCR7  | rs4316537   | c.231C>T     | p.Thr77Thr  | Heterozygous | Unknown Significance |
| DHCR7  | rs949177    | c.438T>C     | p.Asn146Asn | Homozygous   | Likely Benign        |
| DHCR7  |             | c.626+15G>A  |             | Homozygous   | Likely Benign        |
| DHCR7  |             | c.*480C>T    |             | Homozygous   | Likely Benign        |

## MOLECULAR DIAGNOSTICS REPORT

| Gene  | dbSNP ID    | cDNA         | AA           | Zygoty       | Intepretation        |
|-------|-------------|--------------|--------------|--------------|----------------------|
| DHCR7 | rs1790334   | c.207T>C     | p.Thr69Thr   | Homozygous   | Benign               |
| DHCR7 | rs760241    | c.1158T>C    | p.Asp386Asp  | Homozygous   | Benign               |
| DHCR7 |             | c.*643C>T    |              | Homozygous   | Benign               |
| DHCR7 |             | c.*734A>G    |              | Homozygous   | Benign               |
| DMD   | rs228406    | c.2645A>G    |              | Homozygous   | Benign               |
| DMD   | rs1801187   | c.5234G>A    |              | Homozygous   | Benign               |
| DMD   | rs1800280   | c.8810G>A    |              | Homozygous   | Benign               |
| DMD   |             | c.9649+15T>C |              | Homozygous   | Benign               |
| DSP   |             | c.273+10C>T  |              | Heterozygous | Unknown Significance |
| DSP   | rs2806234   | c.741T>G     | p.Ala247Ala  | Homozygous   | Benign               |
| DSP   | rs2076304   | c.2091A>G    | p.Gly697Gly  | Homozygous   | Benign               |
| DSP   | rs1016835   | c.2631G>A    | p.Arg877Arg  | Homozygous   | Benign               |
| DSP   | rs2744380   | c.8472G>C    | p.Gly2824Gly | Homozygous   | Benign               |
| DTNA  | rs117571555 | c.210G>A     | p.Leu70Leu   | Heterozygous | Unknown Significance |
| DTNA  |             | c.*172C>T    |              | Heterozygous | Unknown Significance |
| DTNA  |             | c.*174A>G    |              | Heterozygous | Unknown Significance |
| DTNA  |             | c.*310C>T    |              | Heterozygous | Unknown Significance |
| DTNA  |             | c.*2126C>T   |              | Heterozygous | Unknown Significance |
| DTNA  |             | c.1653+14G>A |              | Heterozygous | Likely Benign        |
| DYSF  |             | c.1351A>G    | p.Met451Val  | Heterozygous | Unknown Significance |
| DYSF  |             | c.6204+15C>T |              | Heterozygous | Unknown Significance |
| DYSF  |             | c.1353+13C>T |              | Homozygous   | Likely Benign        |
| DYSF  | rs17718530  | c.5859A>C    | p.Pro1953Pro | Heterozygous | Likely Benign        |
| DYSF  | rs2303596   | c.1827T>C    | p.Asp609Asp  | Homozygous   | Benign               |
| DYSF  | rs2288355   | c.2583A>T    | p.Ser861Ser  | Heterozygous | Benign               |
| DYSF  | rs2303606   | c.4008C>A    | p.Ile1336Ile | Heterozygous | Benign               |
| EGR2  |             | c.*288G>A    |              | Heterozygous | Unknown Significance |
| EGR2  | rs224083    | c.627G>A     | p.Pro209Pro  | Homozygous   | Benign               |
| ENG   |             | c.1029C>T    | p.Thr343Thr  | Heterozygous | Unknown Significance |
| ENG   | rs142803546 | c.1095C>T    | p.Asp365Asp  | Heterozygous | Unknown Significance |
| ENG   |             | c.-324A>G    |              | Homozygous   | Benign               |
| ESRRB |             | c.*1068C>T   |              | Heterozygous | Unknown Significance |
| ESRRB |             | c.*643T>C    |              | Heterozygous | Likely Benign        |
| ESRRB | rs2361293   | c.885T>C     | p.Tyr295Tyr  | Homozygous   | Benign               |
| EYA4  |             | c.829G>A     | p.Gly277Ser  | Heterozygous | Unknown Significance |
| EYA4  |             | c.*2302G>A   |              | Heterozygous | Unknown Significance |

## MOLECULAR DIAGNOSTICS REPORT

| Gene | dbSNP ID   | cDNA        | AA           | Zygoty       | Intepretation        |
|------|------------|-------------|--------------|--------------|----------------------|
| EYA4 |            | c.*3014T>C  |              | Heterozygous | Unknown Significance |
| EYA4 |            | c.*23C>T    |              | Homozygous   | Likely Benign        |
| EYA4 |            | c.*1264T>A  |              | Homozygous   | Benign               |
| EYA4 |            | c.*1434A>G  |              | Homozygous   | Benign               |
| EYS  |            | c.1922A>T   | p.Glu641Val  | Heterozygous | Unknown Significance |
| EYS  |            | c.3787A>G   | p.Ile1263Val | Heterozygous | Unknown Significance |
| EYS  |            | c.3973C>G   | p.Gln1325Glu | Heterozygous | Unknown Significance |
| EYS  |            | c.4081A>G   | p.Ile1361Val | Heterozygous | Unknown Significance |
| EYS  |            | c.4352T>C   | p.Ile1451Thr | Heterozygous | Unknown Significance |
| EYS  |            | c.4543C>T   | p.Arg1515Trp | Heterozygous | Unknown Significance |
| EYS  |            | c.4549A>G   | p.Ser1517Gly | Heterozygous | Unknown Significance |
| EYS  |            | c.5617C>G   | p.Leu1873Val | Heterozygous | Unknown Significance |
| EYS  | rs12193967 | c.359C>T    | p.Thr120Met  | Homozygous   | Likely Benign        |
| EYS  |            | c.3444-5C>T |              | Heterozygous | Likely Benign        |
| EYS  |            | c.3906C>T   | p.His1302His | Heterozygous | Likely Benign        |
| EYS  |            | c.3936A>G   | p.Thr1312Thr | Heterozygous | Likely Benign        |
| EYS  |            | c.4026C>T   | p.Ser1342Ser | Heterozygous | Likely Benign        |
| EYS  |            | c.4593G>A   | p.Glu1531Glu | Heterozygous | Likely Benign        |
| EYS  | rs974110   | c.1146T>C   | p.Asn382Asn  | Homozygous   | Benign               |
| EYS  | rs9345601  | c.1809C>T   | p.Val603Val  | Heterozygous | Benign               |
| EYS  | rs9342464  | c.1891G>A   | p.Gly631Ser  | Heterozygous | Benign               |
| EYS  | rs9294631  | c.2555T>C   | p.Leu852Pro  | Homozygous   | Benign               |
| EYS  | rs624851   | c.4256T>C   | p.Leu1419Ser | Homozygous   | Benign               |
| F2   |            | c.494C>T    | p.Thr165Met  | Heterozygous | Unknown Significance |
| F5   |            | c.1242A     |              | Homozygous   | Unknown Significance |
| F5   | rs4524     | c.2573A>G   |              | Heterozygous | Unknown Significance |
| F5   | rs4525     | c.2594A>G   |              | Heterozygous | Unknown Significance |
| F5   | rs6032     | c.2773A>G   |              | Heterozygous | Unknown Significance |
| F5   |            | c.237A>G    |              | Heterozygous | Likely Benign        |
| F5   | rs6022     | c.552G>T    |              | Heterozygous | Likely Benign        |
| F5   | rs6016     | c.2208C>T   |              | Heterozygous | Likely Benign        |
| F5   | rs6017     | c.2235T>C   |              | Heterozygous | Likely Benign        |
| F5   | rs6021     | c.2301A>G   |              | Heterozygous | Likely Benign        |
| F5   | rs1800594  | c.3804T>C   |              | Heterozygous | Likely Benign        |
| F5   | rs9287090  | c.3948C>T   |              | Heterozygous | Likely Benign        |
| F5   | rs9332607  | c.4095C>T   |              | Heterozygous | Likely Benign        |
| F5   | rs6030     | c.5290A>G   |              | Heterozygous | Likely Benign        |

## MOLECULAR DIAGNOSTICS REPORT

| Gene   | dbSNP ID   | cDNA         | AA          | Zygoty       | Intepretation        |
|--------|------------|--------------|-------------|--------------|----------------------|
| F5     |            | c.*1601C>T   |             | Heterozygous | Likely Benign        |
| F5     | rs6029     | c.405G>A     |             | Heterozygous | Benign               |
| F5     | rs6025     | c.1601A>G    |             | Homozygous   | Benign               |
| F5     |            | c.5419+12A>G |             | Homozygous   | Benign               |
| F5     |            | c.*1115C>T   |             | Heterozygous | Benign               |
| F5     |            | c.*2328G>C   |             | Homozygous   | Benign               |
| FAH    |            | c.82-13G>A   |             | Homozygous   | Benign               |
| FANCA  | rs1800282  | c.17T>A      | p.Val6Asp   | Heterozygous | Unknown Significance |
| FANCA  |            | c.710-12A>G  |             | Homozygous   | Benign               |
| FANCA  | rs2239359  | c.1501G>A    | p.Gly501Ser | Homozygous   | Benign               |
| FANCC  |            | c.584A>T     | p.Asp195Val | Heterozygous | Likely Benign        |
| FANCD2 | rs12330369 | c.1401G>A    | p.Thr467Thr | Heterozygous | Unknown Significance |
| FANCD2 | rs12330599 | c.1413+14T>C |             | Heterozygous | Unknown Significance |
| FANCD2 |            | c.*550C>T    |             | Heterozygous | Likely Benign        |
| FANCE  | rs4713867  | c.387A>C     | p.Pro129Pro | Heterozygous | Benign               |
| FANCF  |            | c.*207C>T    |             | Homozygous   | Benign               |
| FANCF  |            | c.*632G>A    |             | Homozygous   | Benign               |
| FANCF  |            | c.*819C>T    |             | Homozygous   | Benign               |
| FANCI  | rs7183618  | c.2547G>A    | p.Lys849Lys | Homozygous   | Benign               |
| FGD4   |            | c.993+8G>A   |             | Heterozygous | Unknown Significance |
| FGD4   |            | c.*4991A>G   |             | Homozygous   | Benign               |
| FIG4   |            | c.1948+3A>G  |             | Homozygous   | Likely Benign        |
| FKTN   | rs34787999 | c.608G>A     | p.Arg203Gln | Heterozygous | Unknown Significance |
| FKTN   |            | c.-158G>C    |             | Heterozygous | Likely Benign        |
| FKTN   | rs17309806 | c.1026C>A    | p.Leu342Leu | Heterozygous | Likely Benign        |
| G6PD   |            | c.1311C>T    | p.Tyr437Tyr | Homozygous   | Likely Benign        |
| G6PD   |            | c.1365-13T>C |             | Homozygous   | Likely Benign        |
| GAA    | rs1800301  | c.642C>T     | p.Ser214Ser | Heterozygous | Likely Benign        |
| GAA    | rs1800310  | c.2133A>G    | p.Thr711Thr | Homozygous   | Likely Benign        |
| GAA    |            | c.*223C>T    |             | Homozygous   | Likely Benign        |
| GAA    | rs1800300  | c.324T>C     | p.Cys108Cys | Homozygous   | Benign               |
| GAA    |            | c.547-4C>G   |             | Homozygous   | Benign               |
| GAA    | rs1042393  | c.596A>G     | p.His199Arg | Homozygous   | Benign               |
| GAA    | rs1042395  | c.668G>A     | p.Arg223His | Homozygous   | Benign               |
| GAA    |            | c.955+12G>A  |             | Homozygous   | Benign               |
| GAA    | rs1800304  | c.1203G>A    | p.Gln401Gln | Homozygous   | Benign               |
| GAA    | rs1126690  | c.2338G>A    | p.Val780Ile | Homozygous   | Benign               |
| GAA    | rs1042397  | c.2553G>A    | p.Gly851Gly | Homozygous   | Benign               |
| GALC   | rs11552556 | c.330C>T     | p.Asp110Asp | Heterozygous | Unknown Significance |
| GALC   | rs398076   | c.1350C>T    | p.Ser450Ser | Heterozygous | Likely Benign        |
| GALC   |            | c.*626C>T    |             | Homozygous   | Likely Benign        |
| GALC   |            | c.*723G>A    |             | Homozygous   | Likely Benign        |
| GALC   |            | c.*1453A>G   |             | Homozygous   | Likely Benign        |



## MOLECULAR DIAGNOSTICS REPORT

| Gene   | dbSNP ID    | cDNA        | AA          | Zygoty       | Intepretation        |
|--------|-------------|-------------|-------------|--------------|----------------------|
| GALC   | rs367327    | c.1620A>G   | p.Thr540Thr | Homozygous   | Benign               |
| GALC   | rs398607    | c.1685T>C   | p.Ile562Thr | Homozygous   | Benign               |
| GALC   | rs421466    | c.1698A>T   | p.Val566Val | Homozygous   | Benign               |
| GALC   |             | c.1834+5C>G |             | Homozygous   | Benign               |
| GALC   | rs421262    | c.1921A>G   | p.Thr641Ala | Homozygous   | Benign               |
| GALC   |             | c.*627A>G   |             | Homozygous   | Benign               |
| GALC   |             | c.*989G>A   |             | Homozygous   | Benign               |
| GALNS  | rs117053987 | c.723C>T    | p.Ala241Ala | Heterozygous | Unknown Significance |
| GARS   |             | c.2095-6C>T |             | Homozygous   | Likely Benign        |
| GARS   | rs1049402   | c.124C>G    | p.Pro42Ala  | Homozygous   | Benign               |
| GATM   |             | c.1252T>C   | p.Leu418Leu | Heterozygous | Benign               |
| GATM   |             | c.*940C>T   |             | Heterozygous | Benign               |
| GCDH   |             | c.*288G>T   |             | Heterozygous | Unknown Significance |
| GCDH   |             | c.*165A>G   |             | Heterozygous | Benign               |
| GCK    |             | c.*332G>A   |             | Heterozygous | Likely Benign        |
| GDAP1  | rs11554166  | c.507T>G    | p.Ser169Ser | Heterozygous | Likely Benign        |
| GDAP1  |             | c.*1855A>G  |             | Heterozygous | Likely Benign        |
| GDAP1  |             | c.*2214A>G  |             | Heterozygous | Likely Benign        |
| GDAP1  | rs7828201   | c.102G>C    | p.Ser34Ser  | Homozygous   | Benign               |
| GDAP1  |             | c.*797A>G   |             | Homozygous   | Benign               |
| GJB2   |             | c.*84T>C    |             | Heterozygous | Benign               |
| GJB2   |             | c.*1067G>T  |             | Heterozygous | Benign               |
| GJB2   |             | c.*1152G>A  |             | Heterozygous | Benign               |
| GJB2   |             | c.*1277T>C  |             | Homozygous   | Benign               |
| GJB3   |             | c.*43C>A    |             | Heterozygous | Unknown Significance |
| GJB3   |             | c.*493C>T   |             | Heterozygous | Unknown Significance |
| GJB3   |             | c.*53G>A    |             | Heterozygous | Likely Benign        |
| GJB6   |             | c.*337G>T   |             | Heterozygous | Likely Benign        |
| GLB1   |             | c.458-11T>C |             | Heterozygous | Unknown Significance |
| GLB1   |             | c.1233+8T>C |             | Heterozygous | Unknown Significance |
| GLB1   | rs7637099   | c.29C>T     |             | Heterozygous | Benign               |
| GLB1   | rs7614776   | c.34T>C     |             | Heterozygous | Benign               |
| GLB1   | rs4302331   | c.1561T>C   |             | Homozygous   | Benign               |
| GM2A   | rs61740602  | c.458T>C    | p.Val153Ala | Heterozygous | Unknown Significance |
| GM2A   |             | c.*227A>G   |             | Heterozygous | Likely Benign        |
| GM2A   | rs153477    | c.175A>G    | p.Ile59Val  | Heterozygous | Benign               |
| GM2A   | rs153478    | c.205A>G    | p.Met69Val  | Heterozygous | Benign               |
| GM2A   |             | c.*944T>C   |             | Heterozygous | Benign               |
| GNPTAB | rs10778148  | c.1932A>G   | p.Thr644Thr | Heterozygous | Benign               |
| GNPTAB |             | c.3135+5T>C |             | Heterozygous | Benign               |
| GNS    | rs1147096   | c.198G>A    | p.Pro66Pro  | Homozygous   | Benign               |
| GNS    |             | c.*380C>T   |             | Homozygous   | Benign               |

## MOLECULAR DIAGNOSTICS REPORT

| Gene    | dbSNP ID   | cDNA       | AA          | Zygoty       | Intepretation        |
|---------|------------|------------|-------------|--------------|----------------------|
| GNS     |            | c.*1353G>A |             | Homozygous   | Benign               |
| GNS     |            | c.*2361C>G |             | Homozygous   | Benign               |
| GPSM2   |            | c.-258C>T  |             | Heterozygous | Unknown Significance |
| GPSM2   |            | c.380G>A   | p.Arg127Gln | Heterozygous | Unknown Significance |
| GPSM2   |            | c.*211G>A  |             | Heterozygous | Likely Benign        |
| GPSM2   |            | c.*455C>T  |             | Heterozygous | Likely Benign        |
| GRN     |            | c.264+7G>A |             | Heterozygous | Unknown Significance |
| GRXCR1  | rs78136490 | c.25G>A    | p.Glu9Lys   | Heterozygous | Unknown Significance |
| GRXCR1  |            | c.627+8A>C |             | Heterozygous | Benign               |
| GUCA1B  |            | c.*1318G>A |             | Homozygous   | Likely Benign        |
| GUCA1B  |            | c.-17T>C   |             | Homozygous   | Benign               |
| GUCA1B  | rs3749921  | c.171T>C   | p.Tyr57Tyr  | Homozygous   | Benign               |
| HADHA   |            | c.*202G>A  |             | Homozygous   | Benign               |
| HADHB   |            | c.-201G>A  |             | Homozygous   | Likely Benign        |
| HADHB   |            | c.*136G>C  |             | Homozygous   | Benign               |
| HBB     | rs713040   | c.9T>C     | p.His3His   | Homozygous   | Benign               |
| HEXA    | rs1800431  | c.1306A>G  | p.Ile436Val | Homozygous   | Benign               |
| HEXA    | rs4777502  | c.1518A>G  | p.Glu506Glu | Homozygous   | Benign               |
| HEXA    |            | c.*515G>A  |             | Homozygous   | Benign               |
| HEXA    |            | c.*589T>G  |             | Homozygous   | Benign               |
| HEXB    | rs820878   | c.185T>C   |             | Homozygous   | Benign               |
| HEXB    | rs11556045 | c.362A>G   |             | Heterozygous | Benign               |
| HGSNAT  |            | c.*1780C>T |             | Heterozygous | Unknown Significance |
| HGSNAT  | rs1126058  | c.1749T>C  | p.Tyr583Tyr | Homozygous   | Benign               |
| HGSNAT  |            | c.*1801T>C |             | Homozygous   | Benign               |
| HNF1A   | rs1169305  | c.1720A>G  |             | Homozygous   | Benign               |
| HPD     |            | c.97A>G    |             | Homozygous   | Likely Benign        |
| HPD     |            | c.-55G>A   |             | Homozygous   | Benign               |
| HSPB8   |            | c.*684G>A  |             | Heterozygous | Unknown Significance |
| HSPB8   |            | c.*644A>G  |             | Heterozygous | Likely Benign        |
| IDUA    | rs3755954  | c.352C>T   | p.Leu118Leu | Heterozygous | Likely Benign        |
| IGHMBP2 |            | c.-2C>T    |             | Heterozygous | Unknown Significance |
| IGHMBP2 |            | c.*665C>T  |             | Heterozygous | Unknown Significance |
| IGHMBP2 |            | c.*681T>C  |             | Heterozygous | Unknown Significance |
| IGHMBP2 | rs11228413 | c.1554C>T  | p.Val518Val | Heterozygous | Likely Benign        |
| IGHMBP2 | rs622082   | c.2011A>G  | p.Thr671Ala | Heterozygous | Likely Benign        |
| IGHMBP2 | rs546382   | c.2316C>T  | p.Ser772Ser | Heterozygous | Likely Benign        |
| IGHMBP2 | rs560096   | c.602T>C   | p.Leu201Ser | Homozygous   | Benign               |
| IGHMBP2 | rs10896380 | c.823A>G   | p.Ile275Val | Heterozygous | Benign               |
| IGHMBP2 | rs2236654  | c.2080C>T  | p.Arg694Trp | Heterozygous | Benign               |
| IGHMBP2 |            | c.*255T>C  |             | Homozygous   | Benign               |

## MOLECULAR DIAGNOSTICS REPORT

| Gene   | dbSNP ID   | cDNA        | AA           | Zygotity     | Intepretation        |
|--------|------------|-------------|--------------|--------------|----------------------|
| IKBKAP | rs2230792  | c.2294G>A   | p.Gly765Glu  | Heterozygous | Unknown Significance |
| IKBKAP |            | c.3214T>A   | p.Cys1072Ser | Heterozygous | Unknown Significance |
| IKBKAP |            | c.3473C>T   | p.Pro1158Leu | Heterozygous | Unknown Significance |
| IKBKAP | rs2230793  | c.2446A>C   | p.Ile816Leu  | Heterozygous | Likely Benign        |
| IKBKAP | rs1063110  | c.3069G>C   | p.Leu1023Leu | Heterozygous | Likely Benign        |
| IKBKAP |            | c.*1351C>A  |              | Heterozygous | Likely Benign        |
| IVD    |            | c.243+14T>C |              | Heterozygous | Benign               |
| IVD    |            | c.*808C>G   |              | Heterozygous | Benign               |
| IVD    |            | c.*1471G>A  |              | Heterozygous | Benign               |
| IVD    |            | c.*1577C>G  |              | Heterozygous | Benign               |
| IVD    |            | c.*1610C>T  |              | Heterozygous | Benign               |
| IVD    |            | c.*2844T>C  |              | Heterozygous | Benign               |
| IYD    |            | c.*2742G>A  |              | Heterozygous | Unknown Significance |
| IYD    |            | c.*3655G>A  |              | Heterozygous | Unknown Significance |
| IYD    |            | c.*4035G>A  |              | Heterozygous | Unknown Significance |
| IYD    |            | c.*5218T>C  |              | Heterozygous | Unknown Significance |
| IYD    |            | c.*5333C>A  |              | Heterozygous | Unknown Significance |
| IYD    |            | c.*337C>T   |              | Homozygous   | Likely Benign        |
| IYD    |            | c.*1121C>G  |              | Heterozygous | Likely Benign        |
| IYD    |            | c.*2072A>G  |              | Heterozygous | Likely Benign        |
| IYD    |            | c.*2509C>T  |              | Heterozygous | Likely Benign        |
| IYD    |            | c.*2815G>A  |              | Heterozygous | Likely Benign        |
| IYD    |            | c.*4243A>G  |              | Heterozygous | Likely Benign        |
| IYD    |            | c.*4295G>A  |              | Heterozygous | Likely Benign        |
| IYD    |            | c.*4439T>C  |              | Heterozygous | Likely Benign        |
| IYD    |            | c.*4691A>C  |              | Homozygous   | Likely Benign        |
| IYD    |            | c.*1066C>T  |              | Homozygous   | Benign               |
| IYD    |            | c.*1198T>G  |              | Homozygous   | Benign               |
| IYD    |            | c.*1535T>C  |              | Homozygous   | Benign               |
| IYD    |            | c.*1615G>A  |              | Homozygous   | Benign               |
| IYD    |            | c.*1616T>A  |              | Homozygous   | Benign               |
| IYD    |            | c.*1856G>A  |              | Heterozygous | Benign               |
| IYD    |            | c.*2028T>C  |              | Heterozygous | Benign               |
| IYD    |            | c.*2814T>C  |              | Homozygous   | Benign               |
| IYD    |            | c.*3995A>C  |              | Homozygous   | Benign               |
| JAG1   | rs45534738 | c.*756A>G   |              | Heterozygous | Unknown Significance |
| JAG1   | rs1131695  | c.765C>T    | p.Tyr255Tyr  | Heterozygous | Likely Benign        |
| JAG1   |            | c.*1572A>G  |              | Homozygous   | Likely Benign        |
| JAG1   | rs1051419  | c.3417T>C   | p.Tyr1139Tyr | Homozygous   | Benign               |
| JUP    |            | c.-88A>G    |              | Heterozygous | Benign               |
| JUP    | rs7405731  | c.213T>C    | p.Asp71Asp   | Homozygous   | Benign               |

## MOLECULAR DIAGNOSTICS REPORT

| Gene   | dbSNP ID   | cDNA         | AA           | Zygoty       | Intepretation        |
|--------|------------|--------------|--------------|--------------|----------------------|
| JUP    | rs1126821  | c.2089A>T    | p.Met697Leu  | Heterozygous | Benign               |
| JUP    |            | c.*225T>C    |              | Heterozygous | Benign               |
| KCNE1  |            | c.*124A>G    |              | Homozygous   | Likely Benign        |
| KCNE1  |            | c.*456C>T    |              | Homozygous   | Likely Benign        |
| KCNE1  |            | c.*2480A>G   |              | Homozygous   | Likely Benign        |
| KCNE1  | rs17846179 | c.112A>G     | p.Ser38Gly   | Homozygous   | Benign               |
| KCNE1  |            | c.*1219A>G   |              | Homozygous   | Benign               |
| KCNE1  |            | c.*2007T>C   |              | Homozygous   | Benign               |
| KCNE1  |            | c.*2529C>T   |              | Homozygous   | Benign               |
| KCNE3  |            | c.*1977A>C   |              | Heterozygous | Likely Benign        |
| KCNE3  |            | c.*2019C>T   |              | Heterozygous | Benign               |
| KCNJ2  |            | c.*1794C>A   |              | Heterozygous | Unknown Significance |
| KCNQ1  |            | c.1394-14C>T |              | Heterozygous | Unknown Significance |
| KCNQ1  | rs11601907 | c.1986C>T    | p.Tyr662Tyr  | Heterozygous | Likely Benign        |
| KIF1B  | rs12125492 | c.4161A>G    | p.Pro1387Pro | Heterozygous | Unknown Significance |
| KIF1B  |            | c.*1133C>T   |              | Heterozygous | Unknown Significance |
| KIF1B  |            | c.*1159G>A   |              | Heterozygous | Unknown Significance |
| KIF1B  |            | c.*2042C>T   |              | Heterozygous | Benign               |
| KLHL7  | rs15775    | c.352C>T     | p.Leu118Leu  | Homozygous   | Benign               |
| LAMP2  |            | c.*4579A>G   |              | Homozygous   | Benign               |
| LDB3   |            | c.-114T>C    |              | Heterozygous | Benign               |
| LDLR   |            | c.*1217C>G   |              | Homozygous   | Unknown Significance |
| LDLR   | rs688      | c.1773C>T    | p.Asn591Asn  | Homozygous   | Likely Benign        |
| LDLR   | rs5925     | c.1959T>C    | p.Val653Val  | Homozygous   | Likely Benign        |
| LDLR   |            | c.*1268C>T   |              | Homozygous   | Likely Benign        |
| LDLR   |            | c.*1743C>T   |              | Homozygous   | Likely Benign        |
| LDLR   |            | c.1060+7T>C  |              | Homozygous   | Benign               |
| LDLR   |            | c.1060+10G>C |              | Homozygous   | Benign               |
| LDLR   | rs5930     | c.1413A>G    | p.Arg471Arg  | Homozygous   | Benign               |
| LDLR   | rs5927     | c.2232A>G    | p.Arg744Arg  | Homozygous   | Benign               |
| LDLR   |            | c.*315G>C    |              | Homozygous   | Benign               |
| LDLR   |            | c.*666T>C    |              | Homozygous   | Benign               |
| LDLR   |            | c.*1262T>C   |              | Homozygous   | Benign               |
| LIPA   | rs1051338  | c.46A>C      | p.Thr16Pro   | Heterozygous | Unknown Significance |
| LIPA   |            | c.*909T>A    |              | Heterozygous | Unknown Significance |
| LITAF  |            | c.*796T>C    |              | Heterozygous | Unknown Significance |
| LITAF  |            | c.*1251A>G   |              | Heterozygous | Likely Benign        |
| LOXHD1 | rs12606417 | c.4868A>G    | p.Glu1623Gly | Heterozygous | Unknown Significance |
| LOXHD1 |            | c.5213+13G>A |              | Heterozygous | Unknown Significance |

## MOLECULAR DIAGNOSTICS REPORT

| Gene     | dbSNP ID    | cDNA        | AA           | Zygoty       | Intepretation        |
|----------|-------------|-------------|--------------|--------------|----------------------|
| LOXHD1   |             | c.6398G>A   | p.Arg2133His | Heterozygous | Unknown Significance |
| LOXHD1   | rs1377016   | c.6107C>T   | p.Ala2036Val | Heterozygous | Likely Benign        |
| LOXHD1   | rs1893566   | c.3463A>G   | p.Arg1155Gly | Homozygous   | Benign               |
| LRRK2    |             | c.2857T>C   |              | Heterozygous | Likely Benign        |
| LRRK2    | rs2256408   | c.149G>A    |              | Homozygous   | Benign               |
| LRRK2    | rs10878245  | c.457T>C    |              | Homozygous   | Benign               |
| MANBA    | rs2866413   | c.2102C>T   | p.Thr701Met  | Heterozygous | Benign               |
| MANBA    | rs2272697   | c.2368T>C   | p.Leu790Leu  | Heterozygous | Benign               |
| MANBA    |             | c.*124T>C   |              | Heterozygous | Benign               |
| MANBA    |             | c.*161C>T   |              | Heterozygous | Benign               |
| MANBA    |             | c.*384C>T   |              | Heterozygous | Benign               |
| MANBA    |             | c.*401G>A   |              | Heterozygous | Benign               |
| MANBA    |             | c.*505G>A   |              | Heterozygous | Benign               |
| MAPT     |             | c.-285A>G   |              | Heterozygous | Unknown Significance |
| MAPT     |             | c.-133C>A   |              | Heterozygous | Unknown Significance |
| MAPT     |             | c.-13A>G    |              | Heterozygous | Unknown Significance |
| MAPT     |             | c.307+9A>G  |              | Heterozygous | Unknown Significance |
| MAPT     |             | c.*26T>C    |              | Heterozygous | Unknown Significance |
| MAPT     |             | c.*334A>G   |              | Heterozygous | Unknown Significance |
| MAPT     |             | c.*1067T>C  |              | Heterozygous | Unknown Significance |
| MAPT     |             | c.*1101A>G  |              | Heterozygous | Unknown Significance |
| MAPT     |             | c.*1152G>C  |              | Heterozygous | Unknown Significance |
| MAPT     |             | c.*1328A>C  |              | Heterozygous | Unknown Significance |
| MAPT     |             | c.*1396T>C  |              | Heterozygous | Unknown Significance |
| MAPT     |             | c.*1759T>C  |              | Heterozygous | Unknown Significance |
| MAPT     |             | c.*2079C>T  |              | Heterozygous | Unknown Significance |
| MAPT     |             | c.*2288T>C  |              | Heterozygous | Unknown Significance |
| MAPT     |             | c.*2289G>A  |              | Heterozygous | Unknown Significance |
| MAPT     |             | c.*2806A>C  |              | Heterozygous | Unknown Significance |
| MAPT     |             | c.*2972T>C  |              | Heterozygous | Unknown Significance |
| MAPT     | rs116444268 | c.765T>C    | p.Asn255Asn  | Heterozygous | Likely Benign        |
| MAPT     | rs114553892 | c.681A>G    | p.Ala227Ala  | Heterozygous | Benign               |
| MAPT     |             | c.*3858A>G  |              | Heterozygous | Benign               |
| MARVELD2 |             | c.1147-9T>G |              | Homozygous   | Likely Benign        |

## MOLECULAR DIAGNOSTICS REPORT

| Gene  | dbSNP ID   | cDNA         | AA           | Zygoty       | Intepretation        |
|-------|------------|--------------|--------------|--------------|----------------------|
| MAT1A |            | c.*67C>T     |              | Heterozygous | Unknown Significance |
| MAT1A | rs77083841 | c.*610G>C    |              | Heterozygous | Unknown Significance |
| MAT1A |            | c.*1206G>A   |              | Heterozygous | Unknown Significance |
| MAT1A | rs1143694  | c.426T>C     | p.Ala142Ala  | Homozygous   | Benign               |
| MAT1A | rs10788546 | c.870A>G     | p.Val290Val  | Homozygous   | Benign               |
| MAT1A | rs10887711 | c.882T>C     | p.Ala294Ala  | Homozygous   | Benign               |
| MAT1A |            | c.1085+14C>T |              | Heterozygous | Benign               |
| MAT1A | rs2993763  | c.1131C>T    | p.Tyr377Tyr  | Heterozygous | Benign               |
| MAT1A |            | c.*1297T>C   |              | Heterozygous | Benign               |
| MCCC1 | rs7622479  | c.396C>T     | p.Leu132Leu  | Homozygous   | Benign               |
| MCCC1 | rs2270968  | c.1391A>C    | p.His464Pro  | Homozygous   | Benign               |
| MCCC2 |            | c.*593G>T    |              | Heterozygous | Unknown Significance |
| MCCC2 |            | c.-117A>G    |              | Homozygous   | Benign               |
| MCCC2 | rs10064079 | c.1368A>G    | p.Ala456Ala  | Homozygous   | Benign               |
| MCCC2 |            | c.*247C>T    |              | Homozygous   | Benign               |
| MCCC2 |            | c.*1243G>C   |              | Homozygous   | Benign               |
| MCEE  | rs11541017 | c.227C>T     | p.Ala76Val   | Homozygous   | Likely Benign        |
| MEFV  | rs1231122  | c.1764G>A    | p.Pro588Pro  | Heterozygous | Likely Benign        |
| MEFV  | rs224225   | c.306T>C     | p.Asp102Asp  | Heterozygous | Benign               |
| MEFV  | rs224224   | c.414A>G     | p.Gly138Gly  | Heterozygous | Benign               |
| MEFV  | rs224223   | c.495C>A     | p.Ala165Ala  | Heterozygous | Benign               |
| MEFV  | rs224213   | c.942C>T     | p.Arg314Arg  | Heterozygous | Benign               |
| MEFV  | rs224208   | c.1422G>A    | p.Glu474Glu  | Heterozygous | Benign               |
| MEFV  | rs224207   | c.1428A>G    | p.Gln476Gln  | Heterozygous | Benign               |
| MEFV  | rs224206   | c.1530T>C    | p.Asp510Asp  | Heterozygous | Benign               |
| MEFV  |            | c.*245G>A    |              | Heterozygous | Benign               |
| MEFV  |            | c.*267G>A    |              | Heterozygous | Benign               |
| MEFV  |            | c.*1056G>T   |              | Heterozygous | Benign               |
| MERTK |            | c.757+13T>C  |              | Heterozygous | Likely Benign        |
| MERTK |            | c.2080-11C>A |              | Heterozygous | Likely Benign        |
| MERTK | rs7604639  | c.1397G>A    | p.Arg466Lys  | Heterozygous | Benign               |
| MERTK | rs2230515  | c.1552A>G    | p.Ile518Val  | Heterozygous | Benign               |
| MERTK | rs1131244  | c.1881A>G    | p.Ser627Ser  | Heterozygous | Benign               |
| MFN2  |            | c.*58A>G     |              | Homozygous   | Benign               |
| MFN2  |            | c.*896G>C    |              | Homozygous   | Benign               |
| MLH1  |            | c.-93G>A     |              | Heterozygous | Likely Benign        |
| MLH1  |            | c.655A>G     | p.Ile219Val  | Heterozygous | Likely Benign        |
| MLH3  |            | c.2531C>T    | p.Pro844Leu  | Heterozygous | Unknown Significance |
| MLH3  |            | c.*957C>A    |              | Heterozygous | Likely Benign        |
| MLH3  |            | c.*958G>T    |              | Heterozygous | Likely Benign        |
| MLH3  |            | c.*2417G>A   |              | Heterozygous | Likely Benign        |
| MLH3  |            | c.*3148A>G   |              | Heterozygous | Likely Benign        |
| MLH3  | rs175081   | c.2476A>G    | p.Asn826Asp  | Homozygous   | Benign               |
| MLH3  | rs13712    | c.4335A>G    | p.Gln1445Gln | Heterozygous | Benign               |

## MOLECULAR DIAGNOSTICS REPORT

| Gene   | dbSNP ID    | cDNA         | AA          | Zygoty       | Intepretation        |
|--------|-------------|--------------|-------------|--------------|----------------------|
| MMAA   | rs11721553  | c.747G>A     | p.Ser249Ser | Heterozygous | Unknown Significance |
| MMAA   |             | c.*2608T>C   |             | Heterozygous | Benign               |
| MMAA   |             | c.*2768A>T   |             | Heterozygous | Benign               |
| MMAB   |             | c.56G>A      | p.Arg19His  | Heterozygous | Unknown Significance |
| MMAB   |             | c.*380A>T    |             | Heterozygous | Unknown Significance |
| MMAB   | rs143292900 | c.*1067C>T   |             | Heterozygous | Unknown Significance |
| MMAB   |             | c.*1409G>A   |             | Heterozygous | Unknown Significance |
| MMAB   |             | c.57C>A      | p.Arg19Arg  | Heterozygous | Likely Benign        |
| MMAB   |             | c.*625G>C    |             | Heterozygous | Likely Benign        |
| MMAB   |             | c.*891C>A    |             | Heterozygous | Likely Benign        |
| MMAB   |             | c.*3148G>A   |             | Heterozygous | Likely Benign        |
| MMAB   | rs9593      | c.716T>A     | p.Met239Lys | Heterozygous | Benign               |
| MMAB   |             | c.*857G>C    |             | Heterozygous | Benign               |
| MMAB   |             | c.*1230G>T   |             | Heterozygous | Benign               |
| MMADHC | rs11545261  | c.453G>A     | p.Gln151Gln | Heterozygous | Benign               |
| MMADHC |             | c.*89T>C     |             | Homozygous   | Benign               |
| MMADHC |             | c.*126A>G    |             | Heterozygous | Benign               |
| MPI    |             | c.345+15G>A  |             | Heterozygous | Likely Benign        |
| MPI    |             | c.670+9A>G   |             | Heterozygous | Likely Benign        |
| MPI    | rs1130741   | c.1131A>G    | p.Val377Val | Heterozygous | Benign               |
| MPZ    |             | c.*761A>G    |             | Heterozygous | Unknown Significance |
| MSH6   |             | c.1186C>G    | p.Leu396Val | Heterozygous | Unknown Significance |
| MSH6   | rs1800935   | c.540T>C     | p.Asp180Asp | Heterozygous | Likely Benign        |
| MSH6   | rs1800937   | c.642C>T     | p.Tyr214Tyr | Heterozygous | Likely Benign        |
| MTMR2  | rs3824874   | c.8A>C       | p.Lys3Thr   | Heterozygous | Likely Benign        |
| MTMR2  | rs566204    | c.1131C>T    | p.Thr377Thr | Heterozygous | Likely Benign        |
| MTMR2  |             | c.*549G>A    |             | Heterozygous | Likely Benign        |
| MTMR2  |             | c.*1419G>A   |             | Heterozygous | Likely Benign        |
| MTMR2  |             | c.*1568C>T   |             | Heterozygous | Likely Benign        |
| MTMR2  |             | c.*1934T>C   |             | Heterozygous | Likely Benign        |
| MUT    |             | c.-198A>T    |             | Heterozygous | Likely Benign        |
| MUT    | rs1141321   | c.1595G>A    | p.Arg532His | Heterozygous | Likely Benign        |
| MUT    | rs2229384   | c.636G>A     | p.Lys212Lys | Homozygous   | Benign               |
| MUT    |             | c.1495G>A    | p.Ala499Thr | Heterozygous | Benign               |
| MUT    | rs8589      | c.2011A>G    | p.Ile671Val | Homozygous   | Benign               |
| MYH14  |             | c.3557+9C>T  |             | Heterozygous | Unknown Significance |
| MYH14  |             | c.1090+13C>T |             | Heterozygous | Likely Benign        |
| MYH14  |             | c.2232-14C>T |             | Homozygous   | Likely Benign        |
| MYH14  | rs4801822   | c.657G>A     | p.Ala219Ala | Homozygous   | Benign               |
| MYH14  | rs1651553   | c.2127A>G    | p.Pro709Pro | Homozygous   | Benign               |
| MYH14  | rs3745504   | c.2895G>A    | p.Leu965Leu | Homozygous   | Benign               |

## MOLECULAR DIAGNOSTICS REPORT

| Gene   | dbSNP ID   | cDNA         | AA           | Zygoty       | Intepretation        |
|--------|------------|--------------|--------------|--------------|----------------------|
| MYH14  |            | c.2910+11T>C |              | Homozygous   | Benign               |
| MYH14  | rs3745509  | c.5307G>A    | p.Ser1769Ser | Heterozygous | Benign               |
| MYH14  |            | c.5555+12C>T |              | Heterozygous | Benign               |
| MYH14  |            | c.*216T>G    |              | Heterozygous | Benign               |
| MYH7   | rs735711   | c.1095G>A    | p.Lys365Lys  | Heterozygous | Unknown Significance |
| MYH7   | rs7157716  | c.2967T>C    | p.Ile989Ile  | Heterozygous | Likely Benign        |
| MYH7   | rs2069540  | c.189C>T     | p.Thr63Thr   | Heterozygous | Benign               |
| MYH9   |            | c.1554+7A>G  |              | Homozygous   | Likely Benign        |
| MYH9   |            | c.*596G>A    |              | Heterozygous | Likely Benign        |
| MYH9   |            | c.1728+10G>A |              | Homozygous   | Benign               |
| MYH9   | rs710181   | c.3429T>G    | p.Ala1143Ala | Homozygous   | Benign               |
| MYO15A |            | c.3140C>G    | p.Pro1047Arg | Heterozygous | Unknown Significance |
| MYO15A |            | c.-219-14T>C |              | Heterozygous | Benign               |
| MYO15A |            | c.-76A>C     |              | Heterozygous | Benign               |
| MYO15A | rs2955365  | c.1783G>A    | p.Ala595Thr  | Heterozygous | Benign               |
| MYO15A | rs2955366  | c.1899A>G    | p.Pro633Pro  | Heterozygous | Benign               |
| MYO15A | rs2955367  | c.2152T>G    | p.Trp718Gly  | Heterozygous | Benign               |
| MYO15A | rs2955379  | c.7185T>C    | p.Phe2395Phe | Homozygous   | Benign               |
| MYO3A  |            | c.624C>T     | p.Asp208Asp  | Heterozygous | Unknown Significance |
| MYO3A  |            | c.660C>T     | p.Ala220Ala  | Heterozygous | Unknown Significance |
| MYO3A  | rs3824700  | c.956G>A     | p.Arg319His  | Heterozygous | Likely Benign        |
| MYO3A  |            | c.1053+11C>T |              | Heterozygous | Likely Benign        |
| MYO3A  |            | c.1053+12A>G |              | Heterozygous | Likely Benign        |
| MYO3A  | rs35379457 | c.1104C>T    | p.Tyr368Tyr  | Heterozygous | Likely Benign        |
| MYO3A  |            | c.1170+7C>T  |              | Heterozygous | Likely Benign        |
| MYO3A  | rs3824699  | c.1042A>G    | p.Ile348Val  | Heterozygous | Benign               |
| MYO3A  | rs3817420  | c.1105G>A    | p.Val369Ile  | Heterozygous | Benign               |
| MYO6   |            | c.553+11T>C  |              | Heterozygous | Unknown Significance |
| MYO6   |            | c.1722C>T    | p.Asp574Asp  | Heterozygous | Unknown Significance |
| MYO6   |            | c.*459A>G    |              | Heterozygous | Unknown Significance |
| MYO6   |            | c.*2027T>C   |              | Heterozygous | Likely Benign        |
| MYO6   |            | c.*4283A>G   |              | Heterozygous | Likely Benign        |
| MYO6   |            | c.*3835C>T   |              | Homozygous   | Benign               |
| MYO7A  | rs948962   | c.5860C>A    | p.Leu1954Ile | Homozygous   | Likely Benign        |
| MYO7A  |            | c.6318G>A    | p.Lys2106Lys | Heterozygous | Likely Benign        |
| MYO7A  | rs762667   | c.783T>C     | p.Gly261Gly  | Heterozygous | Benign               |
| MYO7A  |            | c.3924+12C>T |              | Homozygous   | Benign               |
| MYO7A  | rs7927472  | c.4755C>T    | p.Ser1585Ser | Homozygous   | Benign               |
| MYO7A  | rs2276288  | c.4996A>T    | p.Ser1666Cys | Homozygous   | Benign               |
| MYO7A  | rs2276293  | c.5715A>G    | p.Lys1905Lys | Homozygous   | Benign               |
| MYO7A  |            | c.5743-12T>C |              | Homozygous   | Benign               |
| MYO7A  |            | c.5857-7A>T  |              | Homozygous   | Benign               |



## MOLECULAR DIAGNOSTICS REPORT

| Gene   | dbSNP ID   | cDNA       | AA          | Zygoty       | Intepretation        |
|--------|------------|------------|-------------|--------------|----------------------|
| MYOT   | rs41431944 | c.220A>C   |             | Homozygous   | Benign               |
| MYOZ2  |            | c.*1248G>A |             | Heterozygous | Likely Benign        |
| NAGA   |            | c.*1103T>C |             | Heterozygous | Unknown Significance |
| NAGLU  | rs659497   | c.423T>C   | p.Ser141Ser | Homozygous   | Benign               |
| NAGLU  | rs86312    | c.2209C>G  | p.Arg737Gly | Homozygous   | Benign               |
| NDRG1  |            | c.64-6T>C  |             | Homozygous   | Benign               |
| NEFL   |            | c.*1155T>G |             | Heterozygous | Unknown Significance |
| NEFL   |            | c.*235A>T  |             | Homozygous   | Benign               |
| NEFL   |            | c.*687G>C  |             | Homozygous   | Benign               |
| NEFL   |            | c.*1256G>A |             | Homozygous   | Benign               |
| NF1    | rs1801052  | c.702G>A   | p.Leu234Leu | Heterozygous | Likely Benign        |
| NF1    |            | c.*2201G>A |             | Heterozygous | Benign               |
| NF1    |            | c.*2265C>G |             | Heterozygous | Benign               |
| NF1    |            | c.*2829T>C |             | Heterozygous | Benign               |
| NF2    |            | c.*1792G>A |             | Homozygous   | Unknown Significance |
| NF2    |            | c.*1904A>G |             | Homozygous   | Unknown Significance |
| NF2    |            | c.*2235G>A |             | Homozygous   | Unknown Significance |
| NF2    |            | c.*3274G>A |             | Homozygous   | Unknown Significance |
| NF2    |            | c.*354T>C  |             | Homozygous   | Likely Benign        |
| NF2    |            | c.*1208C>T |             | Homozygous   | Likely Benign        |
| NHLRC1 | rs10949483 | c.332C>T   | p.Pro111Leu | Heterozygous | Benign               |
| NLRP12 |            | c.*266G>T  |             | Heterozygous | Unknown Significance |
| NLRP12 |            | c.-12C>T   |             | Homozygous   | Likely Benign        |
| NLRP12 |            | c.-140T>A  |             | Homozygous   | Benign               |
| NLRP12 | rs4806773  | c.2394G>A  | p.Gln798Gln | Heterozygous | Benign               |
| NLRP12 | rs12460528 | c.2469C>T  | p.Leu823Leu | Heterozygous | Benign               |
| NLRP3  |            | c.-405T>C  |             | Homozygous   | Benign               |
| NLRP3  | rs3806268  | c.732G>A   | p.Ala244Ala | Heterozygous | Benign               |
| NLRP3  | rs4925543  | c.786A>G   | p.Arg262Arg | Heterozygous | Benign               |
| NLRP3  |            | c.*230G>C  |             | Heterozygous | Benign               |
| NLRP3  |            | c.*489C>T  |             | Heterozygous | Benign               |
| NPC1   | rs1805081  | c.644A>G   | p.His215Arg | Heterozygous | Unknown Significance |
| NPC1   | rs1788799  | c.1926G>C  | p.Met642Ile | Heterozygous | Benign               |
| NPC1   | rs1805082  | c.2572A>G  | p.Ile858Val | Heterozygous | Benign               |
| NPC1   | rs1140458  | c.2793C>T  | p.Asn931Asn | Heterozygous | Benign               |
| NRL    |            | c.*221G>A  |             | Homozygous   | Likely Benign        |
| OPA3   |            | c.-38A>G   |             | Heterozygous | Unknown Significance |
| OPA3   |            | c.*638T>A  |             | Heterozygous | Unknown Significance |
| OPA3   | rs3826860  | c.231T>C   | p.Ala77Ala  | Heterozygous | Benign               |
| OPA3   |            | c.*152G>A  |             | Heterozygous | Benign               |

## MOLECULAR DIAGNOSTICS REPORT

| Gene   | dbSNP ID   | cDNA        | AA          | Zygoty       | Intepretation        |
|--------|------------|-------------|-------------|--------------|----------------------|
| OPA3   |            | c.*1950G>A  |             | Heterozygous | Benign               |
| OPA3   |            | c.*3387G>A  |             | Heterozygous | Benign               |
| OPA3   |            | c.*4318T>C  |             | Heterozygous | Benign               |
| OPA3   |            | c.*6790T>C  |             | Homozygous   | Benign               |
| OTOF   | rs13031859 | c.244C>T    | p.Arg82Cys  | Heterozygous | Likely Benign        |
| OTOF   | rs11687696 | c.372A>G    | p.Thr124Thr | Heterozygous | Likely Benign        |
| OTOF   | rs2272069  | c.2580C>G   | p.Val860Val | Heterozygous | Benign               |
| OTOF   | rs4335905  | c.2736G>C   | p.Leu912Leu | Heterozygous | Benign               |
| PAH    |            | c.-71A>C    |             | Heterozygous | Unknown Significance |
| PAH    | rs1042503  | c.735G>A    | p.Val245Val | Heterozygous | Likely Benign        |
| PAH    | rs772897   | c.1155C>G   | p.Leu385Leu | Heterozygous | Benign               |
| PAX8   |            | c.*1000T>C  |             | Heterozygous | Unknown Significance |
| PAX8   |            | c.*2146A>G  |             | Heterozygous | Likely Benign        |
| PAX8   |            | c.*2478C>T  |             | Heterozygous | Likely Benign        |
| PAX8   |            | c.-104C>G   |             | Homozygous   | Benign               |
| PAX8   |            | c.*2309A>G  |             | Heterozygous | Benign               |
| PCDH15 |            | c.706-8C>T  |             | Heterozygous | Benign               |
| PCSK9  |            | c.207+15A>G |             | Homozygous   | Benign               |
| PCSK9  | rs509504   | c.1026A>G   | p.Gln342Gln | Homozygous   | Benign               |
| PCSK9  | rs540796   | c.1380A>G   | p.Val460Val | Homozygous   | Benign               |
| PCSK9  | rs562556   | c.1420G>A   | p.Val474Ile | Homozygous   | Benign               |
| PCSK9  | rs505151   | c.2009G>A   | p.Gly670Glu | Homozygous   | Benign               |
| PCSK9  |            | c.*571C>T   |             | Homozygous   | Benign               |
| PDE6A  |            | c.*2194G>A  |             | Heterozygous | Likely Benign        |
| PDE6A  |            | c.*2336C>T  |             | Heterozygous | Likely Benign        |
| PDE6A  |            | c.*2542G>A  |             | Heterozygous | Likely Benign        |
| PDE6A  |            | c.*608T>C   |             | Heterozygous | Benign               |
| PDE6A  |            | c.*756T>C   |             | Heterozygous | Benign               |
| PDE6A  |            | c.*796A>G   |             | Heterozygous | Benign               |
| PDE6A  |            | c.*1365G>A  |             | Heterozygous | Benign               |
| PDE6A  |            | c.*2009T>C  |             | Heterozygous | Benign               |
| PDE6B  |            | c.655T>C    |             | Heterozygous | Unknown Significance |
| PDE6B  | rs10902758 | c.958G>A    |             | Homozygous   | Benign               |
| PDE6B  |            | c.*12A>G    |             | Heterozygous | Benign               |
| PHOX2B |            | c.*1662A>T  |             | Heterozygous | Unknown Significance |
| PHYH   |            | c.*65G>A    |             | Heterozygous | Likely Benign        |
| PHYH   | rs1747682  | c.153C>T    | p.Asn51Asn  | Homozygous   | Benign               |
| PINK1  |            | c.*415C>G   |             | Heterozygous | Unknown Significance |
| PINK1  |            | c.388-7A>G  |             | Heterozygous | Benign               |
| PINK1  |            | c.960-5G>A  |             | Heterozygous | Benign               |
| PINK1  |            | c.*37A>T    |             | Heterozygous | Benign               |
| PINK1  |            | c.*181C>G   |             | Heterozygous | Benign               |
| PINK1  |            | c.*265G>T   |             | Heterozygous | Benign               |

## MOLECULAR DIAGNOSTICS REPORT

| Gene    | dbSNP ID   | cDNA         | AA           | Zygoty       | Intepretation        |
|---------|------------|--------------|--------------|--------------|----------------------|
| PKD2    |            | c.*1237G>A   |              | Heterozygous | Unknown Significance |
| PKHD1   |            | c.1587T>C    | p.Asn529Asn  | Heterozygous | Unknown Significance |
| PKHD1   |            | c.2489A>G    | p.Asn830Ser  | Heterozygous | Unknown Significance |
| PKHD1   | rs9474143  | c.234C>T     | p.Asp78Asp   | Heterozygous | Likely Benign        |
| PKHD1   |            | c.6854G>A    | p.Gly2285Glu | Heterozygous | Likely Benign        |
| PKHD1   | rs12210295 | c.7587G>A    | p.Gly2529Gly | Heterozygous | Likely Benign        |
| PKHD1   |            | c.8302+12T>A |              | Homozygous   | Likely Benign        |
| PKHD1   | rs1896976  | c.1185T>C    | p.Asp395Asp  | Homozygous   | Benign               |
| PKHD1   | rs2435322  | c.5608T>G    | p.Leu1870Val | Homozygous   | Benign               |
| PKHD1   |            | c.7734-4T>C  |              | Heterozygous | Benign               |
| PKHD1   | rs9349603  | c.7764A>G    | p.Leu2588Leu | Heterozygous | Benign               |
| PKHD1   | rs4715227  | c.11696A>G   | p.Gln3899Arg | Heterozygous | Benign               |
| PKHD1   | rs9381994  | c.12143A>G   | p.Gln4048Arg | Heterozygous | Benign               |
| PKHD1   |            | c.*374T>C    |              | Homozygous   | Benign               |
| PKHD1   |            | c.*3026A>G   |              | Heterozygous | Benign               |
| PKHD1   |            | c.*3393C>A   |              | Heterozygous | Benign               |
| PKP2    |            | c.*1196G>A   |              | Homozygous   | Unknown Significance |
| PKP2    |            | c.*812C>T    |              | Homozygous   | Likely Benign        |
| PKP2    |            | c.*251C>G    |              | Homozygous   | Benign               |
| PKP2    |            | c.*944C>A    |              | Homozygous   | Benign               |
| PKP2    |            | c.*1431G>A   |              | Homozygous   | Benign               |
| PLN     |            | c.*397T>G    |              | Heterozygous | Likely Benign        |
| PLOD1   | rs7551175  | c.295G>A     | p.Ala99Thr   | Heterozygous | Likely Benign        |
| PMP22   |            | c.*577T>C    |              | Heterozygous | Unknown Significance |
| PMP22   |            | c.*59A>C     |              | Heterozygous | Benign               |
| POMGNT1 | rs2292487  | c.681A>G     |              | Heterozygous | Likely Benign        |
| POMGNT1 | rs6659553  | c.1867A>G    |              | Homozygous   | Benign               |
| POMT1   |            | c.751C>T     |              | Heterozygous | Unknown Significance |
| POMT1   |            | c.*421G>A    |              | Heterozygous | Unknown Significance |
| POMT1   | rs2296949  | c.752A>G     |              | Homozygous   | Benign               |
| POMT1   | rs10901065 | c.942T>C     |              | Homozygous   | Benign               |
| POMT1   | rs3739494  | c.1113T>C    |              | Homozygous   | Benign               |
| POMT1   |            | c.2069+13C>T |              | Homozygous   | Benign               |
| POMT1   |            | c.*41T>C     |              | Homozygous   | Benign               |
| POMT1   |            | c.*226T>C    |              | Homozygous   | Benign               |
| POMT1   |            | c.*278T>C    |              | Homozygous   | Benign               |
| POMT1   |            | c.*285A>G    |              | Homozygous   | Benign               |
| POMT1   |            | c.*348C>T    |              | Homozygous   | Benign               |
| POMT1   |            | c.*453T>C    |              | Heterozygous | Benign               |
| POU3F4  | rs5921978  | c.708A>G     | p.Glu236Glu  | Homozygous   | Benign               |
| POU3F4  | rs5921979  | c.710G>C     | p.Gly237Ala  | Homozygous   | Benign               |
| PPT1    |            | c.-83A>G     |              | Homozygous   | Benign               |

## MOLECULAR DIAGNOSTICS REPORT

| Gene   | dbSNP ID   | cDNA         | AA           | Zygoty       | Intepretation        |
|--------|------------|--------------|--------------|--------------|----------------------|
| PPT1   |            | c.*285T>G    |              | Heterozygous | Benign               |
| PPT1   |            | c.*505C>G    |              | Heterozygous | Benign               |
| PPT1   |            | c.*657G>A    |              | Heterozygous | Benign               |
| PRKAG2 |            | c.*112A>G    |              | Heterozygous | Benign               |
| PRKAG2 |            | c.*522G>T    |              | Heterozygous | Benign               |
| PRKAG2 |            | c.*1061G>A   |              | Heterozygous | Benign               |
| PROC   |            | c.-50A>T     |              | Heterozygous | Likely Benign        |
| PROC   | rs5937     | c.768T>C     | p.Asp256Asp  | Heterozygous | Likely Benign        |
| PROC   | rs5936     | c.423G>T     | p.Ser141Ser  | Homozygous   | Benign               |
| PROS1  | rs6123     | c.2001A>G    | p.Pro667Pro  | Heterozygous | Likely Benign        |
| PROS1  |            | c.*520A>C    |              | Heterozygous | Benign               |
| PRPF31 |            | c.-9+14A>G   |              | Heterozygous | Likely Benign        |
| PRPF31 |            | c.1147-9T>C  |              | Homozygous   | Benign               |
| PRPF8  |            | c.993-7A>G   |              | Heterozygous | Unknown Significance |
| PRPF8  |            | c.4639-13G>A |              | Heterozygous | Unknown Significance |
| PRPF8  |            | c.6294G>A    | p.Lys2098Lys | Heterozygous | Unknown Significance |
| PRPF8  | rs11559305 | c.637T>C     | p.Leu213Leu  | Heterozygous | Likely Benign        |
| PRPF8  | rs7503397  | c.891T>C     | p.Asn297Asn  | Homozygous   | Likely Benign        |
| PRPF8  | rs33965342 | c.2847G>A    | p.Pro949Pro  | Homozygous   | Likely Benign        |
| PRPF8  |            | c.3774+6G>A  |              | Homozygous   | Likely Benign        |
| PRPF8  |            | c.6588T>C    | p.His2196His | Heterozygous | Likely Benign        |
| PRPH2  |            | c.318T>C     | p.Val106Val  | Heterozygous | Benign               |
| PRPH2  | rs425876   | c.929G>A     | p.Arg310Lys  | Heterozygous | Benign               |
| PSEN1  |            | c.*672G>A    |              | Heterozygous | Unknown Significance |
| PSEN1  | rs362387   | c.*1381G>A   |              | Heterozygous | Unknown Significance |
| PSEN1  |            | c.*3722C>T   |              | Heterozygous | Likely Benign        |
| PSEN1  |            | c.*1147C>T   |              | Homozygous   | Benign               |
| PSEN2  | rs11405    | c.69T>C      | p.Ala23Ala   | Homozygous   | Benign               |
| PSEN2  | rs6759     | c.129C>T     | p.Asn43Asn   | Homozygous   | Benign               |
| PSEN2  | rs1046240  | c.261C>T     | p.His87His   | Homozygous   | Benign               |
| RAB7A  |            | c.219C>T     | p.Leu73Leu   | Heterozygous | Unknown Significance |
| RAD51C |            | c.859A>G     | p.Thr287Ala  | Heterozygous | Unknown Significance |
| RAG1   |            | c.-65A>G     |              | Heterozygous | Unknown Significance |
| RAG1   |            | c.2880A>G    |              | Heterozygous | Unknown Significance |
| RAG1   |            | c.*1083C>T   |              | Heterozygous | Unknown Significance |
| RAG1   |            | c.*2246T>C   |              | Heterozygous | Unknown Significance |
| RAG1   | rs3740955  | c.746A>G     |              | Heterozygous | Benign               |
| RAG1   |            | c.*3184G>A   |              | Heterozygous | Benign               |

## MOLECULAR DIAGNOSTICS REPORT

| Gene  | dbSNP ID   | cDNA          | AA           | Zygoty       | Intepretation        |
|-------|------------|---------------|--------------|--------------|----------------------|
| RAG2  |            | c.-137T>C     |              | Heterozygous | Unknown Significance |
| RAG2  |            | c.*328A>G     |              | Heterozygous | Benign               |
| RBM20 |            | c.*546C>T     |              | Homozygous   | Unknown Significance |
| RBM20 |            | c.*1553G>A    |              | Homozygous   | Unknown Significance |
| RBM20 |            | c.*1104G>A    |              | Homozygous   | Likely Benign        |
| RBM20 | rs1417635  | c.2303G>C     | p.Trp768Ser  | Homozygous   | Benign               |
| RBM20 |            | c.3452-9G>C   |              | Homozygous   | Benign               |
| RBM20 | rs942077   | c.3667G>C     | p.Glu1223Gln | Homozygous   | Benign               |
| RDH12 |            | c.482G>A      | p.Arg161Gln  | Heterozygous | Unknown Significance |
| RET   |            | c.337+9G>A    |              | Heterozygous | Unknown Significance |
| RET   |            | c.2071G>A     | p.Gly691Ser  | Heterozygous | Unknown Significance |
| RET   |            | c.*388G>A     |              | Heterozygous | Unknown Significance |
| RET   |            | c.2712C>G     | p.Ser904Ser  | Heterozygous | Likely Benign        |
| RET   | rs1800858  | c.135A>G      | p.Ala45Ala   | Heterozygous | Benign               |
| RET   | rs1800860  | c.1296A>G     | p.Ala432Ala  | Heterozygous | Benign               |
| RET   | rs1800861  | c.2307G>T     | p.Leu769Leu  | Heterozygous | Benign               |
| RET   |            | c.*1506G>A    |              | Heterozygous | Benign               |
| RGR   |            | c.19C>T       | p.Leu7Leu    | Heterozygous | Unknown Significance |
| RGR   |            | c.*65A>G      |              | Heterozygous | Likely Benign        |
| RGR   | rs1042454  | c.459C>T      | p.Tyr153Tyr  | Heterozygous | Benign               |
| RHO   |            | c.*925T>C     |              | Heterozygous | Unknown Significance |
| RHO   |            | c.-26A>G      |              | Heterozygous | Likely Benign        |
| RHO   |            | c.*912A>G     |              | Heterozygous | Likely Benign        |
| ROM1  |            | c.-22T>C      |              | Homozygous   | Benign               |
| ROM1  | rs1799959  | c.353G>C      |              | Homozygous   | Benign               |
| RP1   | rs444772   | c.2615G>A     | p.Arg872His  | Heterozygous | Likely Benign        |
| RP1   | rs2293869  | c.2953A>T     | p.Asn985Tyr  | Heterozygous | Likely Benign        |
| RP1   | rs446227   | c.5008G>A     | p.Ala1670Thr | Heterozygous | Likely Benign        |
| RP1   | rs414352   | c.5071T>C     | p.Ser1691Pro | Heterozygous | Likely Benign        |
| RP1   | rs441800   | c.5175A>G     | p.Gln1725Gln | Heterozygous | Likely Benign        |
| RP1   | rs61739567 | c.6098G>A     | p.Cys2033Tyr | Heterozygous | Likely Benign        |
| RP2   |            | c.*828G>A     |              | Homozygous   | Benign               |
| RYR2  | rs17686573 | c.1863C>T     | p.His621His  | Heterozygous | Unknown Significance |
| RYR2  |            | c.8873A>G     | p.Gln2958Arg | Homozygous   | Unknown Significance |
| RYR2  |            | c.11963-11T>C |              | Heterozygous | Likely Benign        |
| RYR2  |            | c.677-11T>A   |              | Heterozygous | Benign               |
| RYR2  | rs3765097  | c.1359C>T     | p.Ser453Ser  | Homozygous   | Benign               |
| RYR2  |            | c.1612+14T>C  |              | Homozygous   | Benign               |
| RYR2  | rs2253273  | c.2973A>G     | p.Ser991Ser  | Homozygous   | Benign               |

## MOLECULAR DIAGNOSTICS REPORT

| Gene     | dbSNP ID   | cDNA          | AA           | Zygoty       | Intepretation        |
|----------|------------|---------------|--------------|--------------|----------------------|
| RYR2     | rs707189   | c.6906T>C     | p.Leu2302Leu | Homozygous   | Benign               |
| RYR2     | rs684923   | c.7806C>T     | p.His2602His | Homozygous   | Benign               |
| RYR2     | rs2797436  | c.9318T>G     | p.Ser3106Ser | Homozygous   | Benign               |
| RYR2     | rs2797441  | c.10503C>T    | p.Thr3501Thr | Homozygous   | Benign               |
| RYR2     | rs2685301  | c.10776C>T    | p.Ser3592Ser | Homozygous   | Benign               |
| RYR2     |            | c.13783-6A>G  |              | Homozygous   | Benign               |
| RYR2     |            | c.13913+12A>C |              | Homozygous   | Benign               |
| SAG      | rs72976383 | c.201C>T      | p.Cys67Cys   | Heterozygous | Unknown Significance |
| SAG      |            | c.1208T>C     | p.Val403Ala  | Heterozygous | Unknown Significance |
| SBF2     |            | c.3646C>G     | p.Gln1216Glu | Heterozygous | Unknown Significance |
| SBF2     |            | c.*514C>T     |              | Homozygous   | Likely Benign        |
| SBF2     |            | c.*1515G>A    |              | Homozygous   | Likely Benign        |
| SBF2     |            | c.4571-6C>T   |              | Homozygous   | Benign               |
| SBF2     |            | c.*1364C>T    |              | Homozygous   | Benign               |
| SCN1B    |            | c.*42T>C      |              | Heterozygous | Unknown Significance |
| SCN1B    |            | c.*86A>C      |              | Heterozygous | Unknown Significance |
| SCN4B    |            | c.*2120A>C    |              | Heterozygous | Unknown Significance |
| SCN4B    |            | c.*2623A>G    |              | Heterozygous | Unknown Significance |
| SCN4B    |            | c.*2879T>C    |              | Heterozygous | Unknown Significance |
| SCN4B    |            | c.*1334G>A    |              | Heterozygous | Likely Benign        |
| SCN4B    |            | c.*785G>A     |              | Heterozygous | Benign               |
| SCN4B    |            | c.*3054T>C    |              | Heterozygous | Benign               |
| SCN5A    |            | c.*1537T>C    |              | Heterozygous | Likely Benign        |
| SCN5A    | rs6599230  | c.87A>G       | p.Ala29Ala   | Homozygous   | Benign               |
| SCN5A    | rs7430407  | c.3183A>G     | p.Glu1061Glu | Heterozygous | Benign               |
| SCN5A    |            | c.5457T>C     | p.Asp1819Asp | Heterozygous | Benign               |
| SCN5A    |            | c.*123A>G     |              | Heterozygous | Benign               |
| SCN5A    |            | c.*962T>A     |              | Heterozygous | Benign               |
| SCN5A    |            | c.*963C>T     |              | Heterozygous | Benign               |
| SERPINA1 |            | c.424C>T      | p.Leu142Leu  | Heterozygous | Unknown Significance |
| SERPINA1 | rs1303     | c.1200A>C     | p.Glu400Asp  | Homozygous   | Unknown Significance |
| SERPINA1 |            | c.*1067G>A    |              | Homozygous   | Unknown Significance |
| SERPINA1 |            | c.*224G>A     |              | Homozygous   | Likely Benign        |
| SERPINA1 | rs709932   | c.374G>A      | p.Arg125His  | Heterozygous | Benign               |
| SERPINA1 |            | c.*968T>C     |              | Homozygous   | Benign               |
| SERPINA1 |            | c.*1221A>G    |              | Homozygous   | Benign               |
| SERPINC1 | rs5877     | c.981A>G      | p.Val327Val  | Heterozygous | Benign               |
| SERPINC1 | rs5878     | c.1011A>G     | p.Gln337Gln  | Heterozygous | Benign               |

## MOLECULAR DIAGNOSTICS REPORT

| Gene     | dbSNP ID  | cDNA        | AA           | Zygoty       | Intepretation        |
|----------|-----------|-------------|--------------|--------------|----------------------|
| SERPINE1 |           | c.*1186C>T  |              | Heterozygous | Unknown Significance |
| SERPINE1 |           | c.*361T>C   |              | Heterozygous | Likely Benign        |
| SERPINE1 |           | c.*722T>G   |              | Heterozygous | Likely Benign        |
| SETX     | rs9411449 | c.1077T>C   | p.Tyr359Tyr  | Homozygous   | Benign               |
| SETX     | rs1185193 | c.3576T>G   | p.Asp1192Glu | Homozygous   | Benign               |
| SETX     | rs543573  | c.4156A>G   | p.Ile1386Val | Homozygous   | Benign               |
| SGCA     |           | c.*6T>C     |              | Homozygous   | Benign               |
| SGCB     |           | c.*521A>T   |              | Heterozygous | Likely Benign        |
| SGCB     |           | c.*1566T>C  |              | Heterozygous | Likely Benign        |
| SGCB     |           | c.*1624C>T  |              | Heterozygous | Likely Benign        |
| SGCB     |           | c.*2097T>G  |              | Homozygous   | Benign               |
| SGCD     |           | c.-94C>G    |              | Heterozygous | Likely Benign        |
| SGCD     |           | c.*1527C>T  |              | Heterozygous | Likely Benign        |
| SGCD     |           | c.*6717G>A  |              | Homozygous   | Benign               |
| SGCG     |           | c.*13C>T    |              | Heterozygous | Unknown Significance |
| SGCG     |           | c.*295T>C   |              | Heterozygous | Likely Benign        |
| SGCG     | rs1800354 | c.860A>G    |              | Homozygous   | Benign               |
| SGSH     |           | c.*315C>T   |              | Homozygous   | Benign               |
| SH3TC2   |           | c.3594A>G   | p.Pro1198Pro | Heterozygous | Unknown Significance |
| SH3TC2   |           | c.*2397G>A  |              | Heterozygous | Unknown Significance |
| SH3TC2   |           | c.*2428C>T  |              | Heterozygous | Unknown Significance |
| SH3TC2   |           | c.*2900G>T  |              | Heterozygous | Unknown Significance |
| SH3TC2   |           | c.*3860G>A  |              | Heterozygous | Unknown Significance |
| SH3TC2   |           | c.*6162C>T  |              | Heterozygous | Unknown Significance |
| SH3TC2   |           | c.*8756G>T  |              | Heterozygous | Unknown Significance |
| SH3TC2   |           | c.*10485G>A |              | Heterozygous | Unknown Significance |
| SH3TC2   |           | c.*10968G>A |              | Heterozygous | Unknown Significance |
| SH3TC2   |           | c.*11120G>A |              | Heterozygous | Unknown Significance |
| SH3TC2   |           | c.*11852G>T |              | Heterozygous | Unknown Significance |
| SH3TC2   |           | c.*14411G>A |              | Heterozygous | Unknown Significance |
| SH3TC2   |           | c.*17317G>A |              | Heterozygous | Unknown Significance |
| SH3TC2   |           | c.*19519G>A |              | Heterozygous | Unknown Significance |
| SH3TC2   |           | c.*929G>C   |              | Heterozygous | Likely Benign        |
| SH3TC2   |           | c.*3196T>C  |              | Heterozygous | Likely Benign        |
| SH3TC2   |           | c.*7292C>T  |              | Heterozygous | Likely Benign        |

## MOLECULAR DIAGNOSTICS REPORT

| Gene     | dbSNP ID   | cDNA        | AA          | Zygotity     | Intepretation        |
|----------|------------|-------------|-------------|--------------|----------------------|
| SH3TC2   |            | c.*14766T>A |             | Heterozygous | Likely Benign        |
| SH3TC2   |            | c.*16631G>A |             | Heterozygous | Likely Benign        |
| SH3TC2   | rs1432794  | c.1587T>G   | p.Arg529Arg | Homozygous   | Benign               |
| SH3TC2   |            | c.*3077C>T  |             | Heterozygous | Benign               |
| SH3TC2   |            | c.*3136G>A  |             | Homozygous   | Benign               |
| SH3TC2   |            | c.*5490G>A  |             | Heterozygous | Benign               |
| SH3TC2   |            | c.*11390A>G |             | Heterozygous | Benign               |
| SH3TC2   |            | c.*15823T>C |             | Homozygous   | Benign               |
| SH3TC2   |            | c.*16020A>C |             | Homozygous   | Benign               |
| SH3TC2   |            | c.*16950T>C |             | Homozygous   | Benign               |
| SH3TC2   |            | c.*17703A>G |             | Homozygous   | Benign               |
| SH3TC2   |            | c.*18554G>T |             | Homozygous   | Benign               |
| SH3TC2   |            | c.*19040A>G |             | Heterozygous | Benign               |
| SH3TC2   |            | c.*19573G>A |             | Heterozygous | Benign               |
| SH3TC2   |            | c.*19919T>C |             | Homozygous   | Benign               |
| SIX1     |            | c.*334C>G   |             | Homozygous   | Benign               |
| SLC16A1  | rs1049434  | c.1470T>A   | p.Asp490Glu | Heterozygous | Benign               |
| SLC16A1  |            | c.*1414C>T  |             | Heterozygous | Benign               |
| SLC17A5  |            | c.*385C>G   |             | Heterozygous | Unknown Significance |
| SLC17A5  |            | c.*971G>A   |             | Heterozygous | Likely Benign        |
| SLC17A8  |            | c.-218T>C   |             | Heterozygous | Unknown Significance |
| SLC17A8  |            | c.*39A>C    |             | Homozygous   | Likely Benign        |
| SLC22A5  |            | c.*1142C>T  |             | Heterozygous | Unknown Significance |
| SLC22A5  |            | c.824+13T>C |             | Heterozygous | Likely Benign        |
| SLC22A5  |            | c.-207C>G   |             | Homozygous   | Benign               |
| SLC22A5  |            | c.652+6A>G  |             | Homozygous   | Benign               |
| SLC22A5  | rs274558   | c.807A>G    | p.Leu269Leu | Heterozygous | Benign               |
| SLC22A5  |            | c.*843T>C   |             | Homozygous   | Benign               |
| SLC22A5  |            | c.*1340A>T  |             | Homozygous   | Benign               |
| SLC25A13 |            | c.328+6A>G  |             | Homozygous   | Benign               |
| SLC26A4  |            | c.*868G>A   |             | Heterozygous | Likely Benign        |
| SLC3A1   | rs3738985  | c.114A>C    | p.Gly38Gly  | Homozygous   | Benign               |
| SLC3A1   |            | c.1332+7C>T |             | Homozygous   | Benign               |
| SLC3A1   | rs698761   | c.1854G>A   | p.Met618Ile | Homozygous   | Benign               |
| SLC3A1   |            | c.*131T>C   |             | Homozygous   | Benign               |
| SLC40A1  |            | c.-98G>C    |             | Homozygous   | Unknown Significance |
| SLC40A1  |            | c.-8C>G     |             | Homozygous   | Unknown Significance |
| SLC7A9   | rs35170371 | c.399C>T    | p.Ser133Ser | Heterozygous | Likely Benign        |
| SLC7A9   | rs12150889 | c.425T>C    | p.Val142Ala | Heterozygous | Likely Benign        |
| SLC7A9   | rs11084673 | c.507C>T    | p.Ser169Ser | Heterozygous | Likely Benign        |
| SLC7A9   | rs1007160  | c.667C>A    | p.Leu223Met | Heterozygous | Likely Benign        |
| SLC7A9   | rs1007161  | c.687C>T    | p.Leu229Leu | Heterozygous | Likely Benign        |
| SLC7A9   | rs2287881  | c.1143C>T   | p.Ala381Ala | Heterozygous | Likely Benign        |
| SLC7A9   |            | c.*79T>C    |             | Heterozygous | Likely Benign        |



## MOLECULAR DIAGNOSTICS REPORT

| Gene    | dbSNP ID   | cDNA         | AA           | Zygoty       | Intepretation        |
|---------|------------|--------------|--------------|--------------|----------------------|
| SLC7A9  |            | c.-172T>A    |              | Heterozygous | Benign               |
| SLX4    | rs8061528  | c.753G>A     | p.Ala251Ala  | Heterozygous | Likely Benign        |
| SLX4    | rs3810812  | c.4500T>C    | p.Asn1500Asn | Homozygous   | Benign               |
| SMPD1   | rs1050239  | c.1522G>A    | p.Gly508Arg  | Homozygous   | Likely Benign        |
| SMPD1   |            | c.107T>C     | p.Val36Ala   | Heterozygous | Benign               |
| SNCA    |            | c.*893C>T    |              | Homozygous   | Likely Benign        |
| SPTA1   |            | c.1588G>A    | p.Glu530Lys  | Heterozygous | Unknown Significance |
| SPTA1   |            | c.1350+14A>T |              | Homozygous   | Likely Benign        |
| SPTA1   |            | c.24+3A>G    |              | Homozygous   | Benign               |
| SPTA1   | rs435080   | c.126C>T     | p.Val42Val   | Homozygous   | Benign               |
| SPTA1   |            | c.813-7A>T   |              | Homozygous   | Benign               |
| SPTA1   | rs325996   | c.942T>A     | p.Ala314Ala  | Homozygous   | Benign               |
| SPTA1   | rs2482965  | c.3487T>G    | p.Ser1163Ala | Homozygous   | Benign               |
| SPTB    |            | c.4222G>C    | p.Gly1408Arg | Heterozygous | Likely Benign        |
| SPTB    |            | c.4293A>G    | p.Arg1431Arg | Heterozygous | Likely Benign        |
| SPTB    |            | c.4476T>C    | p.Leu1492Leu | Heterozygous | Likely Benign        |
| SPTB    |            | c.4482G>A    | p.Val1494Val | Heterozygous | Likely Benign        |
| SPTB    |            | c.4563+12G>C |              | Heterozygous | Likely Benign        |
| STK11   |            | c.*616T>C    |              | Homozygous   | Benign               |
| SUMF1   |            | c.*471T>G    |              | Homozygous   | Unknown Significance |
| SUMF1   |            | c.*291G>A    |              | Homozygous   | Likely Benign        |
| SUMF1   |            | c.*61T>C     |              | Homozygous   | Benign               |
| SUMF1   |            | c.*675A>C    |              | Homozygous   | Benign               |
| TAT     |            | c.43C>T      | p.Pro15Ser   | Heterozygous | Unknown Significance |
| TCAP    | rs1053651  | c.453A>C     | p.Ala151Ala  | Homozygous   | Benign               |
| TECTA   |            | c.2795T>C    | p.Val932Ala  | Heterozygous | Unknown Significance |
| TECTA   | rs12275038 | c.4098G>A    | p.Thr1366Thr | Heterozygous | Likely Benign        |
| TECTA   |            | c.4105+13C>T |              | Heterozygous | Likely Benign        |
| TECTA   | rs612969   | c.1111A>G    | p.Arg371Gly  | Homozygous   | Benign               |
| TECTA   | rs536069   | c.1485A>G    | p.Ala495Ala  | Homozygous   | Benign               |
| TECTA   | rs586473   | c.2805T>C    | p.Tyr935Tyr  | Homozygous   | Benign               |
| TECTA   | rs526433   | c.5171G>A    | p.Ser1724Asn | Homozygous   | Benign               |
| TJP2    |            | c.-185G>A    |              | Homozygous   | Unknown Significance |
| TJP2    |            | c.*183G>A    |              | Homozygous   | Likely Benign        |
| TJP2    | rs2309428  | c.1446C>A    | p.Asp482Glu  | Homozygous   | Benign               |
| TMC1    | rs34532421 | c.1713C>T    | p.Phe571Phe  | Heterozygous | Unknown Significance |
| TMC1    |            | c.-468G>A    |              | Heterozygous | Benign               |
| TMC1    |            | c.-219A>G    |              | Heterozygous | Benign               |
| TMC1    | rs2589615  | c.45C>T      | p.Asp15Asp   | Heterozygous | Benign               |
| TMPRSS3 | rs2839500  | c.757A>G     | p.Ile253Val  | Heterozygous | Unknown Significance |
| TMPRSS3 |            | c.*2G>A      |              | Heterozygous | Likely Benign        |
| TMPRSS3 |            | c.*206A>G    |              | Heterozygous | Likely Benign        |

## MOLECULAR DIAGNOSTICS REPORT

| Gene    | dbSNP ID   | cDNA        | AA            | Zygoty       | Intepretation        |
|---------|------------|-------------|---------------|--------------|----------------------|
| TMPRSS3 |            | c.447-13A>G |               | Homozygous   | Benign               |
| TMPRSS3 | rs2839501  | c.453G>A    | p.Val151Val   | Homozygous   | Benign               |
| TNNI3   |            | c.537G>A    | p.Glu179Glu   | Heterozygous | Unknown Significance |
| TNNI3   |            | c.25-8T>A   |               | Heterozygous | Likely Benign        |
| TNNI3   |            | c.373-10T>G |               | Homozygous   | Benign               |
| TNNT2   |            | c.207G>A    | p.Ser69Ser    | Heterozygous | Unknown Significance |
| TNNT2   |            | c.318C>T    | p.Ile106Ile   | Heterozygous | Benign               |
| TP53    | rs1042522  | c.215C>G    | p.Pro72Arg    | Homozygous   | Benign               |
| TPM1    |            | c.*148G>T   |               | Heterozygous | Unknown Significance |
| TPM1    | rs1071646  | c.453C>A    | p.Ala151Ala   | Homozygous   | Benign               |
| TPO     | rs4927611  | c.769G>T    | p.Ala257Ser   | Homozygous   | Unknown Significance |
| TPO     |            | c.*115G>T   |               | Heterozygous | Unknown Significance |
| TPO     | rs1126797  | c.1998C>T   | p.Asp666Asp   | Heterozygous | Likely Benign        |
| TPO     | rs732608   | c.2145C>T   | p.Pro715Pro   | Heterozygous | Likely Benign        |
| TPO     |            | c.*81C>G    |               | Heterozygous | Likely Benign        |
| TPO     | rs732609   | c.2173A>C   | p.Thr725Pro   | Heterozygous | Benign               |
| TPO     | rs1126799  | c.2540T>C   | p.Val847Ala   | Heterozygous | Benign               |
| TPP1    |            | c.*1588C>T  |               | Homozygous   | Likely Benign        |
| TPP1    |            | c.*1628G>A  |               | Homozygous   | Benign               |
| TRIM32  |            | c.*129C>T   |               | Homozygous   | Benign               |
| TSHR    |            | c.*1152T>A  |               | Heterozygous | Unknown Significance |
| TSHR    |            | c.*431T>C   |               | Heterozygous | Likely Benign        |
| TSHR    |            | c.*909C>T   |               | Heterozygous | Likely Benign        |
| TSHR    | rs1991517  | c.2181G>C   | p.Glu727Asp   | Heterozygous | Benign               |
| TSHR    |            | c.*245C>T   |               | Heterozygous | Benign               |
| TTN     |            | c.1492G>A   | p.Val498Ile   | Heterozygous | Unknown Significance |
| TTN     |            | c.7545C>T   | p.Tyr2515Tyr  | Heterozygous | Unknown Significance |
| TTN     |            | c.20784C>T  | p.Thr6928Thr  | Heterozygous | Unknown Significance |
| TTN     | rs2244492  | c.28132G>A  | p.Gly9378Arg  | Heterozygous | Unknown Significance |
| TTN     |            | c.35254A>G  | p.Lys11752Glu | Heterozygous | Unknown Significance |
| TTN     | rs12464787 | c.63126C>T  | p.Ser21042Ser | Heterozygous | Unknown Significance |
| TTN     | rs56169243 | c.64428T>C  | p.Gly21476Gly | Heterozygous | Unknown Significance |
| TTN     | rs6715406  | c.2244G>A   | p.Glu748Glu   | Heterozygous | Likely Benign        |
| TTN     | rs36051007 | c.29555G>A  | p.Arg9852His  | Heterozygous | Likely Benign        |
| TTN     | rs35833641 | c.49611T>C  | p.His16537His | Heterozygous | Likely Benign        |
| TTN     | rs12463674 | c.70970T>C  | p.Ile23657Thr | Heterozygous | Likely Benign        |
| TTN     | rs10497520 | c.3601A>G   | p.Lys1201Glu  | Homozygous   | Benign               |
| TTN     | rs1552280  | c.3884C>T   | p.Ser1295Leu  | Homozygous   | Benign               |

## MOLECULAR DIAGNOSTICS REPORT

| Gene   | dbSNP ID   | cDNA        | AA            | Zygoty       | Intepretation        |
|--------|------------|-------------|---------------|--------------|----------------------|
| TTN    |            | c.4480+6C>T |               | Homozygous   | Benign               |
| TTN    | rs2291311  | c.9781G>A   | p.Val3261Met  | Homozygous   | Benign               |
| TTN    | rs4894043  | c.9879A>G   | p.Glu3293Glu  | Homozygous   | Benign               |
| TTN    | rs2291310  | c.10256G>A  | p.Ser3419Asn  | Homozygous   | Benign               |
| TTN    | rs2742348  | c.10878C>T  | p.Ser3626Ser  | Homozygous   | Benign               |
| TTN    | rs2562831  | c.19491G>A  | p.Gln6497Gln  | Homozygous   | Benign               |
| TTN    | rs4145333  | c.59542G>C  | p.Ala19848Pro | Homozygous   | Benign               |
| TULP1  | rs2064317  | c.776T>C    | p.Ile259Thr   | Heterozygous | Likely Benign        |
| TULP1  | rs7764472  | c.200C>G    | p.Thr67Arg    | Homozygous   | Benign               |
| TULP1  | rs2064318  | c.783G>C    | p.Lys261Asn   | Homozygous   | Benign               |
| TULP1  |            | c.*318T>G   |               | Heterozygous | Benign               |
| UBA1   |            | c.811+9C>G  |               | Homozygous   | Benign               |
| UGT1A1 |            | c.*211T>C   |               | Homozygous   | Benign               |
| UGT1A1 |            | c.*339G>C   |               | Homozygous   | Benign               |
| UGT1A1 |            | c.*440G>C   |               | Homozygous   | Benign               |
| USH1C  | rs10832796 | c.1440C>T   | p.Val480Val   | Homozygous   | Likely Benign        |
| USH1C  |            | c.*78T>C    |               | Homozygous   | Likely Benign        |
| USH1C  |            | c.*218C>T   |               | Homozygous   | Likely Benign        |
| USH1C  |            | c.*243A>G   |               | Homozygous   | Likely Benign        |
| USH1C  | rs1064074  | c.1557G>C   | p.Glu519Asp   | Homozygous   | Benign               |
| USH2A  | rs10779261 | c.373G>A    |               | Homozygous   | Benign               |
| USH2A  | rs4253963  | c.504A>G    |               | Homozygous   | Benign               |
| USH2A  | rs1805049  | c.4457G>A   |               | Homozygous   | Benign               |
| VAPB   |            | c.*937G>C   |               | Heterozygous | Unknown Significance |
| VAPB   |            | c.*1282A>G  |               | Heterozygous | Unknown Significance |
| VAPB   |            | c.*5250T>C  |               | Heterozygous | Likely Benign        |
| VAPB   |            | c.*5298C>T  |               | Heterozygous | Likely Benign        |
| VCL    | rs767809   | c.2388G>A   | p.Pro796Pro   | Homozygous   | Benign               |
| VCL    | rs2131956  | c.2814C>G   | p.Gly938Gly   | Homozygous   | Benign               |
| VCL    |            | c.*1584T>A  |               | Homozygous   | Benign               |
| WFS1   |            | c.1023C>T   | p.Phe341Phe   | Heterozygous | Unknown Significance |
| WFS1   |            | c.1725C>T   | p.Ala575Ala   | Heterozygous | Unknown Significance |
| WFS1   |            | c.2322G>A   | p.Lys774Lys   | Heterozygous | Unknown Significance |
| WFS1   |            | c.*90G>A    |               | Heterozygous | Unknown Significance |
| WFS1   |            | c.*253G>A   |               | Heterozygous | Unknown Significance |
| WFS1   | rs1801212  | c.997G>A    | p.Val333Ile   | Heterozygous | Likely Benign        |
| WFS1   | rs1801213  | c.684C>G    | p.Arg228Arg   | Heterozygous | Benign               |
| WFS1   |            | c.2565A>G   | p.Ser855Ser   | Heterozygous | Benign               |
| WFS1   |            | c.*47T>C    |               | Heterozygous | Benign               |
| WFS1   |            | c.*91C>T    |               | Heterozygous | Benign               |
